# Supplementary material for: Epigenetic DNA Methylation Signatures Associated With the Severity of Paget’s Disease of Bone
Source: Front Cell Dev Biol. 2022 Jun 13;10:903612. doi: 10.3389/fcell.2022.903612 (PMC9235511; doi:10.3389/fcell.2022.903612)
Supplement: Supplementary file 1 [file Table2.XLSX]

## Sheet: Supplementary Table 2
Supplementary Table 2: Gene Ontology (GO) enrichment analysis for genes associated with PDB severity from site level analysis.
GO.ID	Term	FDR
GO:0090290	Positive regulation of osteoclast prolif...	0.0144444
GO:0030856	Regulation of epithelial cell differenti...	0.0144444
GO:0090289	Regulation of osteoclast proliferation	0.0144444
GO:0002763	Positive regulation of myeloid leukocyte...	0.0144444
GO:0002684	Positive regulation of immune system pro...	0.015
GO:0002449	Lymphocyte mediated immunity	0.0175
GO:0045672	Positive regulation of osteoclast differ...	0.0175
GO:0002460	Adaptive immune response based on somati…	0.0186667
GO:0042303	Molting cycle	0.0186667
GO:0042633	Hair cycle	0.0186667
GO:0072202	Cell differentiation involved in metanep...	0.02125
GO:0045682	Regulation of epidermis development	0.0233333
GO:1904778	Positive regulation of protein localizat...	0.0233333
GO:0002158	Osteoclast proliferation	0.0235
GO:1904776	Regulation of protein localization to ce...	0.0235
GO:0002377	Immunoglobulin production	0.0295238
GO:0045639	Positive regulation of myeloid cell diff...	0.0308
GO:0002440	Production of molecular mediator of immu...	0.0308
GO:0072257	Metanephric nephron tubule epithelial ce...	0.0308
GO:0072307	Regulation of metanephric nephron tubule...	0.0308
GO:0072697	Protein localization to cell cortex	0.0333333
GO:0040032	Post-embryonic body morphogenesis	0.0333333
GO:0030316	Osteoclast differentiation	0.035
GO:0002376	Immune system process	0.0365517
GO:0072674	Multinuclear osteoclast differentiation	0.0376667
GO:2000828	Regulation of parathyroid hormone secret...	0.0406452
GO:0016445	Somatic diversification of immunoglobuli...	0.0446875
GO:0030168	Platelet activation	0.0448485
GO:0060249	Anatomical structure homeostasis	0.0482353
GO:0060789	Hair follicle placode formation	0.0497143
