# Supplementary material for: Epigenetic DNA Methylation Signatures Associated With the Severity of Paget’s Disease of Bone
Source: Front Cell Dev Biol. 2022 Jun 13;10:903612. doi: 10.3389/fcell.2022.903612 (PMC9235511; doi:10.3389/fcell.2022.903612)
Supplement: Supplementary file 2 [file Table3.XLSX]

## Sheet: Supplementary Table 3
Supplementary Table 3. IPA erichment analysis for genes associated with PDB severity from site level analysis.
Categories	Diseases.or.Functions.Annotation	Molecules	FDR
Connective Tissue Development and Function, Skeletal and Muscular System Development and Function, Tissue Development	Morphology of bone	ADAMTS2,FCER1G,GNAS,H19,HYAL2,KIF3A,LIF,PTH,RECQL4,SMO,WWTR1	0.00018146
Organismal Development, Organismal Injury and Abnormalities	Abnormal morphology of head	ADAMTS2,CCR6,GNAS,H19,HIVEP2,HYAL2,LIF,MRPS16,MYCN,PTH,RECQL4,RPS6KA5,SMO	0.0003354
Organismal Development	Morphology of head	ADAMTS2,CCR6,GNAS,H19,HIVEP2,HYAL2,KIF3A,LIF,MRPS16,MYCN,PTH,RECQL4,RPS6KA5,SMO	0.0003354
Cellular Development, Connective Tissue Development and Function, Tissue Development	Differentiation of bone cells	DGKZ,FCER1G,FNDC3B,GNAS,HIVEP2,LIF,PTH,SMO,WWTR1	0.0003569
Hematological System Development and Function, Hematopoiesis, Tissue Morphology	Quantity of hematopoietic cells	ADD2,CCR6,FCER1G,HIVEP2,HYAL2,LIF,MYCN,PTH,SMO	0.0003569
Skeletal and Muscular System Development and Function	Quantity of bone	DGKZ,GNAS,H19,LIF,PTH,SMO,WWTR1	0.0003569
Hematological System Development and Function, Tissue Morphology	Quantity of blood cells	ADD2,CCR6,DGAT1,FCER1G,GNAS,HIVEP2,HYAL2,LIF,MYCN,MYO1G,POLM,PTH,RPS6KA5,SMO,TANK	0.0003569
Cell Morphology, Embryonic Development, Organ Development, Organ Morphology, Organismal Development, Organismal Injury and Abnormalities, Respiratory Disease, Respiratory System Development and Function, Tissue Development, Tissue Morphology	Lack of alveolar type I cells	ABCA3,LIF	0.00035733
Hematological System Development and Function, Tissue Morphology	Quantity of mononuclear leukocytes	CCR6,DGAT1,FCER1G,GNAS,HIVEP2,LIF,MYO1G,POLM,PTH,RPS6KA5,SMO,TANK	0.000408109
Hematological Disease, Organismal Injury and Abnormalities	Bone marrow lesion	BDP1,EPHA1,FCER1G,FNDC3B,GNAS,HSPA1L,KIF3A,MAD1L1,MYCN,NAPB,NUMA1,PTH,RBPMS2,RECQL4,SMO,TRIP13,XRCC1,ZNRF3	0.000566525
Organismal Survival	Perinatal death	ABCA3,FNDC3B,GNAS,H19,LIF,MYCN,PTH,RECQL4,ZNRF3	0.000636707
Endocrine System Disorders, Hematological Disease, Hereditary Disorder, Organismal Injury and Abnormalities	Autosomal dominant hypocalcemia	GNAS,PTH	0.000636707
Cellular Development, Connective Tissue Development and Function, Tissue Development	Differentiation of connective tissue cells	CCDC85B,DGKZ,FCER1G,FNDC3B,GNAS,HIVEP2,HYAL2,LIF,PTH,SMO,WWTR1	0.000645
Dermatological Diseases and Conditions, Organismal Injury and Abnormalities	Loss of hair	DCAF17,DGAT1,GNAS,MEMO1,RECQL4	0.000781167
Gene Expression	Transcription	AFAP1L2,BDP1,CCDC85B,GNAS,H19,HIVEP2,HYAL2,LIF,MAD1L1,MEG3,MYCN,PTH,RNF207,RPS6KA5,SMO,TANK,TRIP13,UBR2,VPS39,WWTR1	0.000781167
Hematological System Development and Function, Lymphoid Tissue Structure and Development, Tissue Morphology	Quantity of lymphocytes	CCR6,DGAT1,FCER1G,HIVEP2,LIF,MYO1G,POLM,PTH,RPS6KA5,SMO,TANK	0.000781167
Connective Tissue Development and Function, Embryonic Development, Organ Morphology, Organismal Development, Skeletal and Muscular System Development and Function, Tissue Development	Mass of tibia	PTH,SMO	0.0008385
Embryonic Development, Organismal Development, Skeletal and Muscular System Development and Function	Limb development	GNAS,KIF3A,MYCN,PTH,SLC7A11,SMO	0.0008385
Hematological System Development and Function, Hematopoiesis, Tissue Morphology	Quantity of hematopoietic progenitor cells	ADD2,CCR6,FCER1G,HIVEP2,HYAL2,LIF,MYCN,PTH	0.000878429
Cellular Function and Maintenance, Connective Tissue Development and Function, Skeletal and Muscular System Development and Function	Regulation of osteoblasts	FNDC3B,PTH	0.00091848
Cell Cycle, Gene Expression	Binding of cAMP response element	GNAS,LIF,RPS6KA5	0.00091848
Connective Tissue Development and Function, Embryonic Development, Organ Development, Organismal Development, Skeletal and Muscular System Development and Function, Tissue Development	Formation of skull bone	FNDC3B,LIF,MYCN	0.00091848
Developmental Disorder, Skeletal and Muscular Disorders	Hypoplasia of muscle	KIF3A,LIF,MYCN	0.00091848
Behavior	Spatial learning	ADD2,EPB41,MARCKS,RPS6KA5,SLC7A11	0.000922846
Connective Tissue Development and Function, Embryonic Development, Organ Development, Organismal Development, Skeletal and Muscular System Development and Function, Tissue Development	Formation of calvaria	FNDC3B,LIF	0.000949071
Connective Tissue Development and Function, Skeletal and Muscular System Development and Function	Resorption of calvaria	LIF,PTH	0.000949071
Inflammatory Disease, Organismal Injury and Abnormalities, Respiratory Disease	Pulmonary emphysema	ADAMTS2,CCR6,PTH,SLC7A11	0.00104448
Connective Tissue Development and Function, Skeletal and Muscular System Development and Function, Tissue Development, Tissue Morphology	Size of osteoid	LIF,PTH	0.00104448
Embryonic Development, Organ Development, Organ Morphology, Organismal Development, Organismal Injury and Abnormalities, Reproductive System Development and Function, Reproductive System Disease, Tissue Development	Abnormal morphology of mammary alveolus	DGAT1,LIF	0.00104448
Cellular Development, Connective Tissue Development and Function, Skeletal and Muscular System Development and Function, Tissue Development	Differentiation of osteoblasts	FNDC3B,GNAS,HIVEP2,PTH,SMO,WWTR1	0.00105619
Hair and Skin Development and Function, Organ Morphology	Thickness of skin	DGAT1,LIF,SMO	0.00107858
Organismal Development	Morphology of body cavity	ABCA3,ADD2,CCR6,DGAT1,FCER1G,GNAS,H19,HIVEP2,KIF3A,LIF,MAD1L1,MYCN,POLM,PTH,RECQL4,SMO,UBR2	0.00107858
Organismal Development, Skeletal and Muscular System Development and Function	Morphology of limb	DGAT1,DGKZ,FCER1G,PTH,RECQL4,SMO	0.00107858
Gene Expression	Paternal imprinting	GNAS,H19	0.00107858
Skeletal and Muscular System Development and Function	Morphology of skeleton	FCER1G,HYAL2,LIF,PTH,RECQL4,SMO	0.00113051
Cell Cycle	Delay in initiation of anaphase	NUMA1,TRIP13	0.00113051
Embryonic Development, Organismal Development, Tissue Development	Formation of ophthalmic vesicle	MYCN,SMO	0.00113051
Organ Morphology	Morphology of skin	ADAMTS2,DGAT1,GNAS,LIF,PTH,SMO	0.00113051
Developmental Disorder, Embryonic Development, Organismal Development, Tissue Morphology	Abnormal morphology of mesenchyme	ABCA3,MYCN,SMO	0.00113051
Connective Tissue Development and Function, Tissue Morphology	Mass of connective tissue	DGAT1,DGKZ,GNAS,PTH,UBL5	0.00113051
Gene Expression	Transcription of RNA	AFAP1L2,BDP1,CCDC85B,GNAS,HIVEP2,HYAL2,LIF,MAD1L1,MEG3,MYCN,PTH,RPS6KA5,SMO,TANK,TRIP13,VPS39,WWTR1	0.00113051
Nervous System Development and Function	Prepulse inhibition	GNAS,HIVEP2,LIF,RNF103	0.00113051
Cellular Development, Cellular Growth and Proliferation, Hematological System Development and Function, Hematopoiesis, Lymphoid Tissue Structure and Development, Tissue Development	Development of mononuclear leukocytes	CCR6,DGKZ,EPHA1,FCER1G,HIVEP2,LIF,MAD1L1,MYCN,POLM,PTH	0.00113051
Connective Tissue Development and Function, Connective Tissue Disorders, Organismal Injury and Abnormalities, Skeletal and Muscular Disorders, Skeletal and Muscular System Development and Function, Tissue Development	Abnormal morphology of bone	ADAMTS2,FCER1G,H19,HYAL2,LIF,PTH,RECQL4	0.00113051
Connective Tissue Disorders, Developmental Disorder, Organismal Injury and Abnormalities, Skeletal and Muscular Disorders	Dysplasia of skeleton	ADAMTS2,GNAS,PTH,RECQL4,SMO	0.00113051
Cellular Function and Maintenance, Connective Tissue Development and Function, Skeletal and Muscular System Development and Function, Tissue Development	Function of osteoclasts	FCER1G,LIF,PTH	0.00113051
Dermatological Diseases and Conditions, Organismal Injury and Abnormalities	Formation of skin lesion	DGAT1,GNAS,RECQL4,SMO	0.00113051
Cellular Development, Cellular Growth and Proliferation, Hematological System Development and Function, Hematopoiesis, Lymphoid Tissue Structure and Development, Tissue Development	Leukopoiesis	CCR6,DGKZ,EPHA1,FCER1G,HIVEP2,LIF,MAD1L1,MYCN,POLM,PTH,SMO	0.00113051
Cellular Assembly and Organization, Cellular Function and Maintenance	Formation of asters	EPB41,NUMA1	0.00113051
Connective Tissue Development and Function, Skeletal and Muscular System Development and Function	Apposition of bone	PTH,WWTR1	0.00113051
Lipid Metabolism, Small Molecule Biochemistry	Incorporation of palmitic acid	ABCA3,DGAT1	0.00113051
Cellular Development, Cellular Growth and Proliferation	Proliferation of blood cells	CCR6,DGKZ,FCER1G,HLA-E,LIF,MAD1L1,MYCN,POLM,PTH,RPS6KA5,SMO,TANK	0.00113051
Cellular Function and Maintenance, Hematological System Development and Function	Function of CD4+ T-lymphocytes	CCR6,FCER1G,HLA-E	0.00113051
Developmental Disorder	Growth failure or short stature	GNAS,H19,HS3ST1,LIF,MYCN,PTH,RECQL4,SMO,UBR2	0.00117252
Cardiac Hypoplasia, Cardiovascular Disease, Developmental Disorder, Organismal Injury and Abnormalities, Skeletal and Muscular Disorders	Hypoplasia of myocardium	KIF3A,MYCN	0.00123195
Antigen Presentation, Inflammatory Response	Antigen presentation by cells	CCR6,FCER1G,HLA-E	0.00123195
Cell Signaling, Molecular Transport, Small Molecule Biochemistry, Vitamin and Mineral Metabolism	Release of Ca2+	CCR6,EPB41,FCER1G,GNAS,LIF,PTH	0.00123195
Nervous System Development and Function, Neurological Disease, Organ Morphology, Organismal Development, Organismal Injury and Abnormalities	Abnormal morphology of brain	CCR6,GNAS,HIVEP2,LIF,MRPS16,MYCN,RPS6KA5	0.00123195
Lipid Metabolism, Small Molecule Biochemistry	Metabolism of diacylglycerol	DGAT1,DGKZ,PTH	0.00124559
Embryonic Development, Organismal Development	Development of body trunk	ABCA3,ADAMTS2,CCR6,DGAT1,FCER1G,KIF3A,LIF,MAD1L1,MYCN,SLC7A11,SMO,UBR2,WWTR1	0.00130248
Developmental Disorder, Skeletal and Muscular Disorders	Congenital anomaly of digit	H19,MYCN,RECQL4,SMO	0.00131867
Organismal Injury and Abnormalities, Renal and Urological Disease	Renal lesion	ABCA3,BDP1,CCR6,DCAF17,GNAS,H19,KIF3A,MYCN,NUMA1,SLC7A11,SMOX,WWTR1,ZC3H13	0.00132604
Connective Tissue Development and Function, Skeletal and Muscular System Development and Function, Tissue Development	Bone volume fraction of trabecular bone	PTH,WWTR1	0.00132604
Neurological Disease	Lack of spontaneous movement	GNAS,MYCN	0.00132604
Skeletal and Muscular System Development and Function	Relaxation of vascular smooth muscle	LIF,PTH	0.00132604
Cell Death and Survival, Cellular Function and Maintenance	Self-renewal of cells	LIF,MYCN,SMO,WWTR1	0.00132604
Cellular Growth and Proliferation, Lymphoid Tissue Structure and Development	Proliferation of lymphatic system cells	CCR6,DGKZ,FCER1G,HLA-E,LIF,MAD1L1,MYCN,POLM,RPS6KA5,SMO,TANK	0.00136478
Gene Expression	Expression of RNA	AFAP1L2,BDP1,CCDC85B,GNAS,H19,HIVEP2,HYAL2,LIF,MAD1L1,MEG3,MYCN,PTH,RNF207,RPS6KA5,SMO,TANK,TRIP13,VPS39,WWTR1	0.00151851
Embryonic Development, Nervous System Development and Function, Organ Development, Organ Morphology, Organismal Development, Tissue Development	Morphogenesis of cerebellum	SMO,XRCC1	0.0015589
Inflammatory Response	Cell-mediated response	CCR6,DGKZ,FCER1G,GNAS,HLA-E	0.00156233
Tissue Morphology	Quantity of cells	ABCA3,ADD2,CCR6,DGAT1,DGKZ,FCER1G,GNAS,HIVEP2,HYAL2,LIF,MAD1L1,MYCN,MYO1G,POLM,PTH,RPS6KA5,SMO,TANK	0.00157451
Digestive System Development and Function, Organ Morphology, Organismal Development	Morphology of intestine	CCR6,MYCN,POLM,PTH,RECQL4	0.00159658
Cell Cycle, DNA Replication, Recombination, and Repair	Spindle checkpoint of mitotic cells	MAD1L1,TRIP13	0.00159658
Connective Tissue Development and Function, Skeletal and Muscular System Development and Function, Tissue Development	Formation of cartilage tissue	KIF3A,PTH	0.00159658
Cellular Development, Cellular Growth and Proliferation, Embryonic Development, Hematological System Development and Function, Hematopoiesis, Lymphoid Tissue Structure and Development, Organ Development, Organismal Development, Tissue Development	Lymphopoiesis	CCR6,DGKZ,EPHA1,FCER1G,HIVEP2,LIF,MAD1L1,MYCN,POLM	0.00159658
Cell Morphology, Cellular Assembly and Organization	Morphology of cytoskeleton	DGKZ,EPB41,MIS12,PTH	0.00160588
Organismal Injury and Abnormalities	Development of pathological cyst	GNAS,WWTR1	0.00169823
Organ Morphology	Morphology of epidermis	ADAMTS2,DGAT1,LIF,SMO	0.00170925
Cellular Growth and Proliferation	Expansion of cells	CCR6,GNAS,LIF,MAD1L1,PTH,SMO	0.00184741
Connective Tissue Disorders, Organismal Injury and Abnormalities, Skeletal and Muscular Disorders, Skeletal and Muscular System Development and Function	Abnormal morphology of skeleton	FCER1G,HYAL2,LIF,PTH,RECQL4	0.00184952
Digestive System Development and Function	Morphology of digestive system	ADAMTS2,CCR6,GNAS,H19,LIF,MYCN,POLM,PTH,RECQL4	0.00184952
Lipid Metabolism, Molecular Transport, Small Molecule Biochemistry	Quantity of diacylglycerol	DGAT1,DGKZ,PTH	0.00196571
Connective Tissue Development and Function, Connective Tissue Disorders, Organ Morphology, Organismal Injury and Abnormalities, Skeletal and Muscular Disorders, Skeletal and Muscular System Development and Function, Tissue Development, Tissue Morphology	Abnormal morphology of xiphoid process	ADAMTS2,H19	0.00201734
Cell Morphology, Cellular Assembly and Organization, Nervous System Development and Function	Elongation of neurites	GNAS,LIF,SMO	0.00201734
Cellular Function and Maintenance	Lymphocyte homeostasis	CCR6,DGKZ,EPHA1,FCER1G,HIVEP2,LIF,MAD1L1,POLM	0.00201734
Psychological Disorders	Hyperactive behavior	DGAT1,GNAS,HIVEP2,LCLAT1	0.00201734
Cellular Development, Cellular Growth and Proliferation, Hematological System Development and Function, Lymphoid Tissue Structure and Development	Proliferation of lymphocytes	CCR6,DGKZ,FCER1G,HLA-E,MAD1L1,MYCN,POLM,RPS6KA5,SMO,TANK	0.00201734
Connective Tissue Development and Function, Skeletal and Muscular System Development and Function, Tissue Morphology	Quantity of osteoblasts	GNAS,LIF,PTH	0.00201734
Organismal Development	Development of genitourinary system	ADAMTS2,DGAT1,FCER1G,GNAS,H19,KIF3A,LIF,SMO,TRIP13,UBR2,WWTR1	0.00201734
Cell-To-Cell Signaling and Interaction, Cellular Growth and Proliferation, Hematological System Development and Function, Hematopoiesis	Stimulation of hematopoietic cells	LIF,PTH	0.00201734
DNA Replication, Recombination, and Repair	Double-stranded DNA break repair	POLM,PTH,TRIP13,XRCC1	0.00201734
Hematological System Development and Function, Humoral Immune Response, Lymphoid Tissue Structure and Development, Tissue Morphology	Quantity of B lymphocytes	CCR6,FCER1G,LIF,MYO1G,POLM,TANK	0.00201734
Skeletal and Muscular Disorders	Limb defect	FCER1G,H19,MYCN,RECQL4,SMO	0.00202326
Cardiovascular Disease, Cardiovascular System Development and Function, Connective Tissue Disorders, Organ Morphology, Organismal Development, Organismal Injury and Abnormalities, Tissue Morphology	Abnormal morphology of pericardium	KIF3A,SMO,UBR2	0.0020425
Cellular Development, Cellular Growth and Proliferation, Embryonic Development, Organismal Development	Proliferation of neuronal progenitor cells	GNAS,LIF,MYCN	0.00205879
Cell Morphology, Embryonic Development, Organ Development, Organ Morphology, Organismal Development, Organismal Injury and Abnormalities, Respiratory Disease, Respiratory System Development and Function, Tissue Development, Tissue Morphology	Abnormal morphology of type II pneumocytes	ABCA3,LIF	0.00205879
Respiratory Disease, Respiratory System Development and Function	Abnormal morphology of respiratory system	ABCA3,ADAMTS2,HYAL2,LIF,MYCN	0.00205879
Embryonic Development, Organismal Development	Growth of embryo	GNAS,KIF3A,LIF,MYCN,SMO,UBR2,XRCC1	0.00206911
Connective Tissue Development and Function, Tissue Morphology	Quantity of connective tissue	ADD2,DGAT1,DGKZ,GNAS,HYAL2,LIF,PTH,UBL5	0.00206911
Cardiovascular Disease, Organismal Injury and Abnormalities	Microangiopathy	LIF,SLC7A11,SMO,ZC3H13	0.00208676
Cell Cycle, Reproductive System Development and Function	Meiosis I of male germ cells	TRIP13,UBR2	0.00210865
Embryonic Development, Hair and Skin Development and Function, Organ Development, Organismal Development, Tissue Development	Formation of epidermis	CD109,KIF3A,NUMA1,SMO	0.00210865
Organismal Development, Skeletal and Muscular System Development and Function	Morphology of hindlimb	DGAT1,DGKZ,SMO	0.00213771
Organismal Survival	Neonatal death	ABCA3,FNDC3B,GNAS,LIF,MYCN,RECQL4	0.00214211
Lymphoid Tissue Structure and Development, Organ Morphology, Tissue Morphology	Quantity of lymphoid organ	CCR6,FCER1G,HIVEP2,LIF,RECQL4	0.00214211
Gene Expression	Transcription of DNA	AFAP1L2,BDP1,CCDC85B,GNAS,HIVEP2,HYAL2,LIF,MYCN,PTH,RPS6KA5,SMO,TRIP13,WWTR1	0.00214211
Cell Death and Survival, Nervous System Development and Function	Cell viability of sympathetic neuron	LIF,MYCN	0.00214211
Developmental Disorder, Embryonic Development, Organismal Development, Tissue Morphology	Abnormal morphology of embryonic tissue	ABCA3,KIF3A,MYCN,SMO,UBR2,XRCC1,ZNRF3	0.00222818
Digestive System Development and Function, Gastrointestinal Disease, Organ Morphology, Organismal Development, Organismal Injury and Abnormalities	Abnormal morphology of small intestine	CCR6,POLM,RECQL4	0.00235919
Connective Tissue Development and Function, Skeletal and Muscular System Development and Function, Tissue Development, Tissue Morphology	Mass of bone tissue	GNAS,PTH	0.0023631
Organismal Development, Skeletal and Muscular System Development and Function	Morphology of forelimb	RECQL4,SMO	0.0023631
Developmental Disorder	Aplasia or hypoplasia	KIF3A,LIF,MRPS16,MYCN,NPHP4,POLM,RPS6KA5	0.0023893
Cellular Development, Cellular Growth and Proliferation, Connective Tissue Development and Function, Skeletal and Muscular System Development and Function, Tissue Development	Formation of osteoclasts	HIVEP2,LIF,PTH,TANK	0.0023893
Hematological System Development and Function, Lymphoid Tissue Structure and Development, Tissue Morphology	Morphology of lymphoid tissue	ADD2,CCR6,FCER1G,HIVEP2,MAD1L1,POLM,RECQL4	0.00239095
Organismal Injury and Abnormalities, Renal Hydronephrosis, Renal and Urological Disease	Hydronephrosis	EPHA1,SMO	0.0220513
Cell-To-Cell Signaling and Interaction, Connective Tissue Development and Function, Hepatic System Development and Function, Liver Fibrosis	Activation of hepatic stellate cells	CCR6,DGAT1	0.0243788
Glomerular Injury, Immunological Disease, Inflammatory Disease, Inflammatory Response, Organismal Injury and Abnormalities, Renal Inflammation, Renal Nephritis, Renal and Urological Disease	Autoimmune glomerulonephritis	ADD2,TANK	0.0259084
Kidney Failure, Organismal Injury and Abnormalities, Renal and Urological Disease	Failure of kidney	FCER1G,KIF3A,PTH,SLC7A11	0.0360125
