# Supplementary material for: Epigenetic DNA Methylation Signatures Associated With the Severity of Paget’s Disease of Bone
Source: Front Cell Dev Biol. 2022 Jun 13;10:903612. doi: 10.3389/fcell.2022.903612 (PMC9235511; doi:10.3389/fcell.2022.903612)
Supplement: Supplementary file 3 [file Table6.XLSX]

## Sheet: Supplementary Table 6
Supplementary Table 6 : Significant promoters from region level association analysis at FDR < 0.05
Red are promoter regions with Bonferroni corrected pvalue ≤ 0.05
Promoter gene	Number of Sites	FDR
RPL27	7	0.0118497
LINC00301	3	0.0118497
VPS29	9	0.0118497
LRRC14	7	0.013394
ZNF571	9	0.0200652
DDX51	9	0.0215285
LOC100133315	14	0.0234206
RAB28	8	0.0234206
CTSD	11	0.0234206
RPS6KA5	10	0.0240144
EPHA1	9	0.0240144
ULBP2	8	0.0240144
SUB1	7	0.0272412
LOC256880	11	0.0272412
TUBGCP3	10	0.0272412
NUDT15	8	0.0272412
LRP2BP	3	0.0272412
CREB3L3	4	0.0273016
RFC2	9	0.0273016
FGF12	17	0.0273016
POLM	9	0.0273016
ESD	9	0.0277721
MYO1G	5	0.0297338
CPA5	1	0.0316273
ZC3H13	9	0.0319232
MTNR1B	7	0.0319232
CNPY3	6	0.0319232
WIPF2	8	0.0319232
YY1	5	0.0374039
PLAC2	5	0.0374039
GTPBP8	9	0.0374039
UBA5	11	0.0374039
BIRC2	6	0.0374039
TM9SF3	4	0.0374039
MIR656	20	0.0374039
C22orf27	8	0.0374039
CDKL2	10	0.0374039
NAPB	8	0.0374039
ARHGEF18	11	0.0374039
ENTPD4	12	0.0374039
TUBG1	11	0.0374039
CMTM1	9	0.0374039
PFDN5	4	0.0374039
NDUFA3	9	0.0374039
CCDC150	8	0.0374039
ATPIF1	4	0.0388562
C2orf29	4	0.0398093
DDRGK1	9	0.0398822
RPPH1	5	0.0400611
FBRSL1	30	0.0400611
C20orf144	4	0.0400611
RDH14	7	0.0400611
DPH3	10	0.0400611
IMP3	9	0.0400611
SNORA39	10	0.0400611
TIPARP	3	0.0400611
DUT	15	0.0400611
ACOT7	19	0.0400611
BPTF	4	0.0400611
SUPT4H1	8	0.0400611
RHOBTB3	7	0.0400611
RPS19	8	0.0400611
RNF103	5	0.0400611
RNF121	12	0.0400611
XRCC1	7	0.0400611
PLEC1	64	0.0400611
EFNA5	9	0.0400611
TNFRSF9	5	0.0400611
DERL2	13	0.0400611
SNORD115-38	5	0.0400611
UBL5	8	0.0400611
DGAT1	7	0.0400611
C6orf134	11	0.0400611
PTH	4	0.0400611
TRAPPC10	4	0.0400611
GNL1	5	0.0400611
OXSM	3	0.0400611
GSR	5	0.0403833
PRKD2	9	0.0403833
LMTK2	7	0.0404914
LSM14A	7	0.0411363
DLL1	12	0.0429895
ETV3	7	0.0433689
TGOLN2	9	0.0433689
AFTPH	5	0.0433689
ISCU	13	0.0433689
NAA16	10	0.0438686
AHCYL2	11	0.0439542
OTUD3	7	0.0442535
DECR2	10	0.0442535
EIF2AK2	14	0.0442634
CDC73	7	0.0442634
P2RX7	3	0.0442634
SPATA19	3	0.0442634
TTC36	4	0.0442634
RECQL4	7	0.0442634
HSD3B7	9	0.0442634
TPO	10	0.0442634
CCDC117	8	0.0442734
EMID1	7	0.0444512
OSBPL5	30	0.0444512
HERPUD2	11	0.0444512
AKR1D1	4	0.0444512
MGAT4A	8	0.0444512
IQCG	15	0.0444512
COL5A2	5	0.0444512
C8orf55	5	0.0446001
CTDSP1	12	0.0446001
DNAJC17	8	0.0449517
WDR88	10	0.0451468
OXNAD1	12	0.0453457
STT3B	7	0.0453457
EXD3	4	0.0453457
PRRT4	4	0.0453457
B3GNT2	9	0.0453457
C6orf165	6	0.0453457
RASL10B	7	0.0453457
RARA	20	0.0453457
C14orf174	8	0.0453457
VPS13B	7	0.0453457
DPP7	2	0.0453457
AKT1	10	0.0453457
CLEC4F	2	0.0453457
THSD7B	6	0.0453457
FAM19A2	6	0.0453457
SART3	15	0.0453457
NOC2L	2	0.0453457
MBNL1	7	0.0453457
PEX11B	11	0.0453457
CAPNS1	8	0.0461166
PGCP	10	0.0461166
TBCC	9	0.0467349
XYLT1	5	0.0467349
GNB2	9	0.0467349
ZNF148	5	0.0467349
FOS	10	0.0467349
SEMA5B	3	0.0467349
CCDC146	2	0.0467349
FLCN	8	0.0467349
EIF2S1	8	0.0467349
SSPO	4	0.0467349
SLCO4A1	5	0.0467349
TPP1	5	0.0467349
UBE2W	6	0.0467349
XPO6	4	0.0467349
NLRX1	5	0.0467349
AADACL3	4	0.0467349
TRUB1	6	0.0467349
ARMC9	8	0.0467349
UCHL3	10	0.0467349
HOOK3	5	0.0467349
ESYT1	9	0.0467349
C14orf70	6	0.0467349
SDF2L1	8	0.0470537
GPR137B	12	0.0472859
MAP3K10	6	0.0473514
ARMC6	5	0.0473514
KRTAP23-1	2	0.0473514
VASH1	7	0.0473514
MED1	6	0.0473514
PANK2	13	0.0473514
FAM151B	5	0.0473514
LOC100128542	2	0.0473514
KCNJ8	7	0.0473514
MIS12	13	0.0473514
SIRT2	12	0.0473514
DIS3L	8	0.0473514
OGFRL1	4	0.0473514
SSSCA1	6	0.0473514
FTSJ3	5	0.0473514
PGLS	8	0.0473514
MRPL53	6	0.0473514
SPR	9	0.0473514
HM13	8	0.0473514
ARHGEF17	9	0.0473514
DRG1	6	0.0473514
ADSSL1	10	0.0473514
MFSD9	3	0.0473514
KLC1	5	0.0473514
TEKT2	3	0.0473514
MIR433	10	0.0473514
C6orf153	10	0.0473514
SSNA1	4	0.0473514
DYNLL1	15	0.0473514
ACAT1	9	0.0473514
LRFN1	6	0.0473514
AP4M1	10	0.0473514
RGS10	6	0.0473514
RPL3	8	0.0473514
ATP13A4	4	0.0473514
MRPS16	10	0.0473514
ZC3H10	10	0.0473514
DNAJC9	8	0.0473514
ARL4C	9	0.0473514
OVCH2	4	0.0473514
STK3	2	0.0473514
EFNA4	13	0.0473514
LOC550112	5	0.0473514
SNORA42	3	0.0473514
GDF9	9	0.0473514
C12orf52	9	0.0473514
ATHL1	4	0.0473514
AFF3	12	0.0473514
MIR191	12	0.0473514
RPN1	10	0.0473514
MIR412	13	0.0473514
MIR152	7	0.0473514
RB1	18	0.0473514
UBAP2	4	0.0473514
FOXS1	3	0.0473514
TMED8	8	0.0473514
TDRD3	15	0.0473514
SEC11A	7	0.0473514
DKFZp686A1627	6	0.0473514
LARS	6	0.0473514
KRTCAP3	7	0.0473514
MIR526A2	3	0.0473514
KIAA0319L	14	0.0473514
MEGF8	9	0.0473514
C12orf67	4	0.0473514
MAP3K3	10	0.0473514
CDH29	5	0.0473514
WDR24	7	0.0473514
CLTA	5	0.0473514
C1orf95	6	0.0473514
DZIP1	10	0.0473514
LGALS3BP	5	0.0473514
ZNF322A	7	0.0473514
DSTYK	7	0.0473514
NARF	14	0.0473514
SNORD43	13	0.0473514
FAM122A	2	0.0473514
ARIH2	11	0.0473514
UBR2	9	0.0473514
CDC37L1	4	0.0473514
IFI6	5	0.0473514
MIER1	9	0.0473514
C3orf52	7	0.0473514
AKAP12	15	0.0473514
PTPRN	6	0.0473514
PIGO	4	0.0473514
ZNF167	8	0.0473514
MIR1471	5	0.0473514
ALDH3B1	14	0.0473514
CBFB	8	0.0473544
UQCRH	12	0.0473544
DDAH2	14	0.0478298
MIB1	4	0.0479215
AMZ2	9	0.0479215
CNTF	4	0.0479215
LOC222699	7	0.0479215
EPB41	11	0.0479215
GUCY2E	11	0.0479215
OCIAD1	15	0.0479215
C3orf75	9	0.0479215
PTPN12	19	0.0479215
C19orf33	5	0.0479215
KATNAL2	7	0.0480693
C1QBP	7	0.0480693
OR1N1	1	0.0480693
IREB2	8	0.0480693
CLTB	4	0.0480693
TUBA4B	7	0.0480693
SNX24	11	0.0480693
RPS3A	8	0.0480693
FAM13A	4	0.0480693
FAM162A	10	0.0480693
GAL3ST4	7	0.0480693
FLJ90757	14	0.0480693
MTMR9L	6	0.0480693
ATP6V0A2	7	0.0480693
ZBTB20	22	0.0480693
RAGE	6	0.0480693
NUDT5	8	0.0480693
GALE	19	0.0480693
RBM42	9	0.0480693
IQCB1	11	0.0482308
EYA3	7	0.0482308
ZNF599	10	0.0482308
POP7	6	0.0482308
PLCG1	5	0.0482308
BCL2	26	0.0482308
DHX15	8	0.0482308
MED19	15	0.0482308
FAM180B	4	0.0482744
CHGB	5	0.0486621
PSPH	6	0.0488575
ENY2	10	0.0488575
FANCE	5	0.0488575
LAMC2	7	0.0488575
ZNF828	4	0.0488575
DNA2	6	0.049088
WIPI2	15	0.049088
YBX2	13	0.0497664
MRPL12	9	0.0499751
IRF2BP2	10	0.0499751
PEBP1	9	0.0499751
C19orf34	5	0.0499751
MGRN1	8	0.0499751
ARL2BP	7	0.0499751
PDP2	5	0.0499751
SQLE	3	0.0499751
RGL2	39	0.0499751
