# Supplementary material for: Epigenetic DNA Methylation Signatures Associated With the Severity of Paget’s Disease of Bone
Source: Front Cell Dev Biol. 2022 Jun 13;10:903612. doi: 10.3389/fcell.2022.903612 (PMC9235511; doi:10.3389/fcell.2022.903612)
Supplement: Supplementary file 4 [file Table4.XLSX]

## Sheet: Supplementary Table 4
Supplementary Table 4: Significant island region-level associated with PDB severity at FDR < 0.05
Red indicates islands with Bonferroni corrected P< 0.05
UCSC_CpG_Islands_Name	number of sites	FDR	Gene
chr10:75757484-75758227	12	0.00431125	VCL
chr12:114840853-114841063	4	0.00431125	TBX5
chr1:10753773-10754176	6	0.00431125	CASZ1
chr6:150262703-150263677	12	0.00431125	ULBP2
chr13:48611646-48612268	16	0.00431125	NUDT15
chr5:179247784-179248711	16	0.00431125	SQSTM1
chr8:80677581-80677996	5	0.00886487
chr15:85777124-85778138	1	0.00999209
chr3:151986327-151987325	16	0.0109822	MBNL1;MBNL1;LOC401093;LOC401093
chr13:113242125-113242656	7	0.0122079	TUBGCP3
chr3:127391011-127392434	11	0.024586	ABTB1;ABTB1;ABTB1
chr15:91208319-91209026	6	0.024586
chr19:38085148-38085811	12	0.024586	ZNF540;ZNF571
chr7:807336-808261	12	0.024586	HEATR2
chr17:41150292-41150649	12	0.024586	RPL27
chr8:126010436-126011194	11	0.024586	SQLE
chr11:74204135-74204856	13	0.024586	LIPT2
chr16:89641053-89643415	15	0.024586	CPNE7;CPNE7
chr16:57278758-57279377	11	0.024586	ARL2BP
chr10:33623120-33626197	15	0.024586	NRP1;NRP1;NRP1
chr14:91526233-91527552	17	0.024586	RPS6KA5;RPS6KA5
chr7:44121856-44122662	13	0.0277491	POLM
chr10:102802633-102802879	6	0.0277491	SFXN3
chr10:102289150-102289742	10	0.0280573	NDUFB8
chr8:145742464-145743826	10	0.0280573	RECQL4;LRRC14
chr2:173099482-173100098	7	0.0280573
chr3:13919939-13922335	15	0.0293032	WNT7A
chr17:1657447-1657677	10	0.0293032
chr12:110939456-110940173	16	0.0293032	RAD9B;VPS29;VPS29
chr2:190526058-190526419	13	0.0295058	ASNSD1
chr6:34664072-34664407	13	0.0295058	C6orf106;C6orf106
chr3:46037013-46037473	11	0.0295058	FYCO1
chr1:117112960-117113883	15	0.0295058	CD58;CD58;CD58
chr4:100870377-100871994	15	0.0295058	DNAJB14
chr9:88356140-88357365	6	0.0295058	AGTPBP1
chr16:70284892-70285956	14	0.0295058	EXOSC6;EXOSC6
chr17:28443746-28444011	19	0.0295058	CCDC55;MIR423
chr13:29292670-29293329	14	0.0295058	SLC46A3;SLC46A3
chr7:150068756-150070051	10	0.0295058	REPIN1;REPIN1;REPIN1;REPIN1
chr20:35422189-35422767	7	0.0295058	C20orf117;C20orf117
chr3:44596535-44597018	14	0.0295058	ZNF167;ZNF167
chr1:244211034-244212088	11	0.0295058
chr11:1784805-1785553	19	0.0295058	HCCA2;CTSD
chr16:88999662-89000346	7	0.0295058	CBFA2T3;CBFA2T3
chr12:133067072-133067735	19	0.0295058	FBRSL1
chr13:114185709-114186062	15	0.0295058	TMCO3
chr5:95997717-95999117	17	0.0295058	CAST;CAST;CAST;CAST;CAST
chr14:101348385-101348698	23	0.0295058	MIR431
chr20:62669304-62670730	7	0.0295058	NCRNA00176;NCRNA00176
chr4:76555366-76556079	15	0.0295058	CDKL2
chr4:13485522-13486533	11	0.0300042	RAB28;RAB28;RAB28
chr7:73152564-73153716	20	0.0300042	ABHD11;ABHD11;ABHD11;ABHD11;ABHD11;ABHD11;ABHD11
chr17:38375440-38375836	10	0.0300042	WIPF2
chr2:235404502-235406541	19	0.0300042	ARL4C
chr7:55954935-55955387	6	0.0300042
chr16:74752697-74752910	5	0.0300042	FA2H
chr22:39777665-39777887	6	0.0300042	SYNGR1
chr1:8002408-8002699	13	0.0300042	TNFRSF9
chr12:52639195-52639416	8	0.0300042	KRT7
chr8:23314664-23315490	17	0.0300042	ENTPD4;ENTPD4
chr9:140317160-140318663	7	0.0300042	NOXA1;EXD3
chr1:205179963-205180910	16	0.0300042	DSTYK;DSTYK
chr17:7756572-7757652	11	0.0300042	KDM6B;TMEM88
chr4:106394551-106395322	15	0.0300042	PPA2;PPA2;PPA2;PPA2;PPA2
chr22:29168628-29169048	12	0.0300042	CCDC117
chr1:161136001-161136686	17	0.0300042	PPOX;PPOX;PPOX;PPOX
chr11:8284102-8285032	19	0.0300042	LMO1
chr4:24585435-24586175	15	0.0300042	DHX15
chr7:2059907-2060131	17	0.0300042	MAD1L1;MAD1L1;MAD1L1
chr9:139622242-139623428	8	0.0300042	SNHG7;SNORA43;SNHG7;SNHG7
chr6:132128727-132129563	15	0.0300042	ENPP1
chr11:124713005-124713395	7	0.0300042
chr19:2163632-2165603	12	0.0300042	DOT1L
chr8:143807788-143809310	10	0.0300042	C8orf55
chr11:32354760-32355484	9	0.0300042
chr17:56429455-56429906	14	0.0300042	SUPT4H1
chr17:80737542-80737774	5	0.0300042	TBCD
chr16:67062613-67064012	15	0.0300042	CBFB;CBFB
chr9:99416904-99417592	8	0.0300042	C9orf21
chr6:42714707-42715042	7	0.0300042
chr17:38497527-38498963	8	0.0300042	RARA;RARA;RARA;RARA
chr2:197504191-197504558	12	0.0300042	CCDC150
chr19:41770013-41771113	15	0.0300042	HNRNPUL1;HNRNPUL1
chr8:145549984-145551217	11	0.0300042	DGAT1
chr7:2272010-2272856	16	0.0300042	MAD1L1;MAD1L1;MAD1L1
chr1:28415098-28415312	14	0.0300042	EYA3
chr6:13328587-13329096	14	0.0303215	TBC1D7;TBC1D7;TBC1D7;TBC1D7
chr8:145008908-145009407	12	0.0303215	PLEC1;PLEC1;PLEC1;PLEC1;PLEC1;PLEC1;PLEC1;PLEC1
chr9:111617320-111618144	9	0.0303215	ACTL7B
chr19:19143924-19144827	12	0.0303215	SFRS14;ARMC6;SFRS14
chr16:66600024-66600619	14	0.0303215	CMTM1;CMTM1;CMTM1;CMTM1;CMTM1;CMTM1;CMTM1;CMTM1
chr12:94495833-94496230	8	0.0303215
chr7:72971527-72972220	11	0.0303215	BCL7B
chr13:113497296-113497661	19	0.0303215	ATP11A;ATP11A
chr3:169386268-169387187	15	0.0303215
chr21:34442206-34444543	22	0.0305865	OLIG1;OLIG1
chr19:42363678-42364765	13	0.0307013
chr2:197791390-197791599	7	0.0307013	PGAP1
chr5:63801781-63802605	16	0.0307013	RGS7BP
chr3:139396338-139396882	13	0.0307013	NMNAT3
chr3:130235989-130236203	7	0.0307013
chr2:37383901-37384402	16	0.0309419	EIF2AK2;EIF2AK2
chr1:233463526-233464414	14	0.0309419	KIAA1804;KIAA1804
chr8:54507107-54507358	9	0.0309419
chr17:78700827-78701124	8	0.0309419	RPTOR;RPTOR
chr13:47370763-47371484	17	0.0309419	ESD
chr17:65821126-65821381	4	0.0309419	BPTF;BPTF
chr6:32729342-32729877	40	0.0309419	HLA-DQB2
chr16:4674706-4675453	15	0.0309419	MGRN1;MGRN1;MGRN1;MGRN1
chr5:137681061-137681274	9	0.0309419	FAM53C;FAM53C
chr9:998463-999034	5	0.0310045
chr22:31795250-31795958	11	0.0311359	DRG1
chr16:84538884-84539115	10	0.0312059	KIAA1609
chr7:100303014-100304079	17	0.0313471	POP7;POP7
chr19:14191987-14192772	5	0.0313665
chr14:101531643-101532384	45	0.0313665
chr2:62115445-62115990	13	0.0313665	CCT4
chr4:170948486-170948908	6	0.0313665	MFAP3L
chr4:75858300-75859931	17	0.0317245	PARM1
chr20:33447179-33447504	6	0.0317245	GGT7
chr22:20939102-20939353	5	0.0319125	MED15;MED15
chr16:14918471-14918799	2	0.0327285
chr20:3184874-3185385	14	0.0327285	DDRGK1
chr13:111290666-111290970	20	0.0328515	CARKD
chr2:119607378-119607910	8	0.0328515
chr7:35733995-35734979	18	0.0328846	HERPUD2;HERPUD2
chr19:45826801-45827164	10	0.0333446	CKM
chr21:38119793-38120742	12	0.0333446	SIM2
chr2:24298969-24299512	9	0.0333446	SF3B14
chr16:88310706-88312553	5	0.033566
chr21:45660202-45660414	4	0.033566	ICOSLG
chr11:73498947-73499265	10	0.033566	MRPL48
chr2:176931575-176932663	8	0.033566
chr19:10443688-10446022	13	0.033566	ICAM3;RAVER1
chr10:74927642-74928063	18	0.033566	FAM149B1;ECD;ECD;ECD;ECD;FAM149B1
chr7:73668393-73669142	14	0.033566	RFC2;RFC2
chr5:60626505-60629809	22	0.033566	ZSWIM6
chr4:37828144-37828945	13	0.033566	PGM2
chr2:47167858-47168978	13	0.033566	MCFD2;MCFD2
chr19:34662931-34664060	13	0.0336278	LSM14A;LSM14A
chr15:74906938-74908538	17	0.0336278	CLK3;CLK3
chr2:114341301-114342298	2	0.0336278	WASH2P
chr10:44500981-44501270	9	0.0336278
chr19:5243869-5244393	5	0.0336278	PTPRS;PTPRS;PTPRS;PTPRS
chr19:33622910-33623231	15	0.0337996	WDR88
chr5:115783075-115783425	11	0.0340998	SEMA6A
chr2:240061326-240061602	14	0.0340998	HDAC4
chr5:1270778-1271101	19	0.0340998	TERT;TERT
chr9:129622611-129623574	5	0.0341209	ZBTB34
chr11:70962173-70964161	17	0.0341209
chr1:1190522-1190799	6	0.0341209	UBE2J2;UBE2J2;UBE2J2;UBE2J2
chr19:44079582-44079905	13	0.0341209	XRCC1
chr2:73339292-73340733	11	0.0341209	RAB11FIP5
chr1:4771652-4772545	13	0.0341209	AJAP1;AJAP1
chr1:18973028-18973304	6	0.0341209	PAX7;PAX7;PAX7
chr11:107992004-107992731	15	0.0341209	ACAT1
chr11:124615389-124617006	11	0.0341209	VSIG2
chr5:125759047-125759298	9	0.0341209	GRAMD3;GRAMD3;GRAMD3;GRAMD3
chr17:75136325-75137730	18	0.0341209	SEC14L1;SEC14L1;SEC14L1;SEC14L1
chr19:39971346-39971718	9	0.0341209	TIMM50
chr5:139060555-139060934	11	0.0341209	CXXC5
chr11:68181086-68181289	10	0.0344208	LRP5
chr9:4490262-4490916	6	0.0344208	SLC1A1
chr16:66583236-66584135	9	0.0344208	TK2
chr7:100964790-100965201	9	0.0344208	RABL5;RABL5;RABL5;RABL5
chr8:1245671-1246464	18	0.0346669
chr3:98376316-98376542	4	0.0346669
chr22:39745983-39746634	9	0.0349244	SYNGR1;SYNGR1
chr22:42078060-42078549	11	0.0349244	NHP2L1;NHP2L1
chr2:233562005-233562547	15	0.035241	GIGYF2;GIGYF2;GIGYF2;GIGYF2
chr4:177240935-177241832	8	0.035349	SPCS3
chr14:75743683-75746798	22	0.035349	FOS
chr5:79551369-79552294	17	0.035349	SERINC5
chr7:149470114-149471054	10	0.035349	SSPO
chr11:64058808-64060118	16	0.035349	KCNK4;KCNK4
chr2:191272484-191273671	10	0.035349
chr21:45431646-45432978	10	0.035349	TRAPPC10
chr10:104159096-104159536	7	0.035349	NFKB2;NFKB2;NFKB2
chr1:3307069-3307285	13	0.035349	PRDM16;PRDM16
chr22:29601547-29602291	13	0.035349
chr12:132219327-132219539	11	0.035349	SFRS8
chr4:141173834-141174567	14	0.035349
chr3:113822136-113822414	5	0.035349
chr19:8563441-8564225	6	0.035349	PRAM1
chr17:17942198-17943495	17	0.035349	ATPAF2;ATPAF2;C17orf39
chr14:95785752-95786151	12	0.035349	CLMN
chr19:5096559-5096857	5	0.035349	KDM4B
chr2:128642787-128644407	8	0.035349	AMMECR1L
chr11:76091524-76092638	11	0.035349	PRKRIR
chr17:40306909-40307263	15	0.0353914	RAB5C;RAB5C
chr16:72698543-72699131	10	0.0355512
chr15:56285260-56286295	12	0.035596	NEDD4
chr19:42579935-42580588	13	0.0356261	ZNF574
chr9:112296438-112296747	2	0.0361734
chr9:139236776-139237518	7	0.0362119	GPSM1
chr6:170703521-170703766	6	0.0372887	FAM120B
chr5:180045789-180048897	14	0.0373723	FLT4;FLT4
chr6:29521110-29521833	50	0.0375073
chr10:129534410-129537366	26	0.0380203	FOXI2
chr7:23338797-23339264	14	0.0383628	C7orf30
chr12:126345899-126346531	8	0.0384293
chr7:128001346-128002066	12	0.0384293	PRRT4
chr6:26124493-26124782	21	0.0384293	HIST1H2AC;HIST1H2BC
chr2:7172296-7172512	9	0.038548	RNF144A
chr19:9938325-9938815	14	0.0385908	UBL5;UBL5
chr17:5389390-5390283	19	0.0388858	DERL2;MIS12
chr19:572278-573134	14	0.0388963	BSG;BSG;BSG
chr15:74988166-74988669	16	0.0389761	EDC3;EDC3;EDC3
chr22:21996241-21997332	15	0.0389761	SDF2L1
chr19:52097252-52098000	7	0.0389761
chr11:14402600-14403086	7	0.0389761
chr19:42772332-42773525	8	0.0389761
chr14:105261334-105261624	13	0.0389761	AKT1;AKT1
chr1:23504059-23504633	9	0.0389761
chr19:524156-524369	4	0.0389761
chr10:134672369-134672604	15	0.0389761
chr15:40401053-40401298	19	0.0389761	BMF
chr16:46655002-46655374	13	0.0389761	SHCBP1
chr17:12920956-12921566	15	0.0389761	ELAC2;ELAC2;ELAC2
chr5:79330928-79331488	12	0.0389761	THBS4
chr13:76123438-76124268	13	0.0389761	UCHL3
chr20:21501961-21503931	15	0.0389761
chr15:75931952-75932782	14	0.0389761	IMP3
chr4:95128657-95129289	17	0.0389761	SMARCAD1;SMARCAD1;SMARCAD1
chr4:184319564-184320198	12	0.0389761
chr9:86571047-86572027	8	0.0389761	C9orf64
chr15:89424629-89424870	10	0.0389761	HAPLN3
chr5:169659830-169660229	14	0.0390465	C5orf58
chr3:156391811-156393607	16	0.0393459	TIPARP;LOC100287227
chr7:100421295-100421515	9	0.0393459	EPHB4
chr19:8495554-8495794	5	0.0393459	MARCH2;MARCH2;MARCH2
chr6:160182429-160183770	20	0.0393459	ACAT2
chr9:140728478-140729896	9	0.0393459	MIR602
chr4:2795139-2795467	5	0.0393459	SH3BP2
chr16:1077527-1077772	12	0.0393459
chr2:198029068-198029438	7	0.0393459	ANKRD44
chr19:57862441-57863236	14	0.0393459	ZNF304
chr1:204380313-204381159	20	0.0393459	PPP1R15B
chr3:57993838-57994704	14	0.0393459	FLNB;FLNB;FLNB;FLNB;FLNB;FLNB;FLNB;FLNB
chr12:113622761-113623931	13	0.0393459	DDX54;DDX54
chr2:239049388-239050089	7	0.0393459	KLHL30
chr17:80416004-80417259	19	0.0393459	NARF;NARF;NARF;NARF
chr20:32251123-32251832	8	0.0393459	NECAB3;NECAB3;C20orf144
chr3:48955810-48956938	24	0.0393459	C3orf71;ARIH2
chr17:34058549-34058778	10	0.0393459	RASL10B
chr19:42829555-42830597	14	0.0393459	MEGF8
chr1:119535666-119535987	9	0.0393459
chr6:42897116-42897611	16	0.0393459	CNPY3;CNPY3
chr3:33138083-33138769	15	0.0394167	TMPPE;GLB1;TMPPE;GLB1;GLB1
chr6:29617765-29617974	25	0.039434
chr5:34915293-34916240	17	0.039434	RAD1;RAD1;BRIX1
chr4:170533398-170533948	11	0.039434	NEK1
chr1:3808490-3809236	10	0.039434	C1orf174
chr5:176793959-176794841	10	0.039434	RGS14
chr12:133484658-133485739	12	0.039434
chr7:159773-160039	18	0.039434
chr19:36630420-36631142	15	0.039434	CAPNS1;CAPNS1
chr18:12777496-12778113	7	0.039434
chr2:171672310-171675447	12	0.039434	GAD1;GAD1
chr13:46626454-46627019	15	0.039434	ZC3H13
chr20:3190011-3190562	15	0.039434	ITPA;ITPA;ITPA;ITPA
chr22:49564050-49564612	5	0.039434
chr11:107328441-107328691	13	0.039434	CWF19L2
chr1:236305534-236306674	11	0.039434	GPR137B
chr17:7296504-7298466	16	0.039434	PLSCR3
chr15:90931162-90932019	10	0.039434	IQGAP1;IQGAP1
chr19:45251975-45252330	14	0.039434	BCL3
chr17:5342128-5342631	12	0.039434	C1QBP
chr2:74699240-74699909	13	0.039434	CCDC142;MRPL53
chr11:68153809-68154192	6	0.039434	LRP5
chr5:137799615-137802253	17	0.039434	EGR1
chr19:17580197-17580598	6	0.039434
chr13:114195709-114196719	16	0.039434	TMCO3
chr19:47219434-47220817	14	0.039434	PRKD2;PRKD2;PRKD2;PRKD2
chr20:61315175-61315497	2	0.039434
chr1:228112950-228113215	11	0.039434	WNT9A
chr7:127910860-127911287	9	0.039434
chr6:42531984-42532292	14	0.039434	UBR2
chr12:26275049-26275878	8	0.039434	BHLHE41
chr12:133294088-133294878	7	0.039434	PGAM5;PGAM5;PGAM5
chr19:37997790-37998125	15	0.039434	ZNF793
chr1:157107749-157108645	12	0.039434	ETV3;ETV3
chr13:50697984-50702286	18	0.039434	DLEU2
chr7:100486729-100488093	12	0.0395028	UFSP1;UFSP1
chr7:1518997-1519444	12	0.0395028	INTS1
chr6:3156959-3157167	4	0.0395028	TUBB2A
chr1:28969553-28969898	16	0.0395028	TAF12;TAF12
chr2:62422191-62424458	19	0.0397245	B3GNT2
chr6:119255738-119256331	9	0.0397634	MCM9;MCM9
chr6:137242315-137245442	21	0.0397634	SLC35D3
chr12:27396982-27397646	15	0.0400236	STK38L
chr2:99224681-99225322	19	0.040162	C2orf64;UNC50
chr11:64509433-64513826	29	0.040162	RASGRP2;RASGRP2;RASGRP2
chr1:35442237-35442936	9	0.040162
chr1:113008844-113009154	11	0.040162	WNT2B
chr22:46545480-46547412	7	0.040162	PPARA;PPARA
chr17:78857630-78857866	20	0.040162	RPTOR;RPTOR
chr3:183892455-183893184	19	0.040162	AP2M1;AP2M1
chr7:77166610-77167337	14	0.0401799	PTPN12;PTPN12;PTPN12
chr22:30639729-30639994	5	0.0402453	LIF
chr2:26568408-26569366	22	0.0403858	GPR113;SELI
chr2:233765849-233766119	7	0.0403858	NGEF;NGEF
chr1:119522385-119522638	9	0.0403858	TBX15
chr6:170686006-170687003	5	0.0403858	FAM120B
chr8:21966485-21967329	11	0.0403858	NUDT18
chr8:745683-745889	3	0.0403858
chr3:63849046-63850357	15	0.0404685	THOC7;ATXN7;ATXN7
chr2:97778469-97779540	3	0.0404685	ANKRD36
chr19:1955331-1955572	5	0.0404685	C19orf34;CSNK1G2
chr16:4783862-4785010	15	0.0404685	ANKS3
chr19:7459779-7460376	13	0.0404685	ARHGEF18
chr12:53689227-53689570	11	0.0404685	ESPL1
chr15:31617763-31620908	13	0.0404685	KLF13;KLF13
chr6:2971086-2971962	11	0.0404685	SERPINB6
chr13:112709884-112712665	17	0.0405486
chr6:74019428-74020053	7	0.0406794	C6orf147
chr13:44542468-44542893	5	0.0406794
chr10:444909-445131	6	0.0409258	DIP2C
chr10:43837787-43838144	7	0.0412385
chr18:76693917-76694195	7	0.0412385
chr8:81398429-81399618	13	0.0412385	ZBTB10;ZBTB10
chr10:26855906-26856198	6	0.0412385	APBB1IP
chr11:65337213-65338474	14	0.0412385	FAM89B;FAM89B;FAM89B;SSSCA1
chr22:29445203-29445482	7	0.0412385	ZNRF3
chr10:98346049-98347064	7	0.0412385	TM9SF3
chr7:74071547-74073035	9	0.0415425	GTF2I;GTF2I;GTF2I;GTF2I;GTF2I
chr20:35491001-35492805	16	0.0415501	C20orf117
chr2:3063372-3063672	14	0.0415501
chr9:133794451-133794661	6	0.0415501	FIBCD1;FIBCD1
chr20:3869453-3870570	16	0.0418236	PANK2;PANK2;PANK2
chr1:46767425-46769036	20	0.0418236	LRRC41;UQCRH
chr11:62341228-62341695	16	0.0418236	EEF1G
chr18:48724198-48724425	8	0.0418236	MEX3C;MEX3C
chr6:27218792-27219813	17	0.0418236	PRSS16
chr12:122687800-122689106	16	0.0418236	B3GNT4
chr8:144691400-144692269	14	0.0418236	PYCRL
chr1:26231950-26233624	27	0.0418236	STMN1;STMN1;STMN1;STMN1
chr8:42294064-42295059	11	0.0418916	SLC20A2
chr2:32234653-32236248	12	0.0420042	MEMO1;MEMO1
chr1:51425447-51426070	16	0.0420042	FAF1;FAF1
chr17:46114573-46115059	11	0.0420042	MIR152;COPZ2
chr9:140703858-140704066	4	0.0420042	EHMT1
chr2:210636344-210636935	10	0.0420042	UNC80;UNC80
chr7:100270875-100274003	27	0.0422909	GNB2
chr15:48623185-48624651	20	0.0422909
chr16:451474-452132	8	0.0426471	DECR2
chr22:31318228-31318489	14	0.0430806	C22orf27
chr6:74171349-74171869	11	0.0430806	MTO1;MTO1;MTO1;MTO1;MTO1;MTO1
chr1:7764593-7765856	14	0.0432845	CAMTA1
chr1:154540233-154540573	11	0.0433119
chr4:81118137-81118603	10	0.0433119	PRDM8;PRDM8
chr19:7968325-7969421	13	0.0433119	MAP2K7
chr14:101292043-101292709	24	0.0433119	MEG3;MEG3;MEG3
chr10:76584625-76586746	18	0.0433484	MYST4
chr4:6200912-6202724	17	0.0433484	JAKMIP1;JAKMIP1;JAKMIP1;JAKMIP1
chr20:30102057-30102856	13	0.0437045	HM13;HM13;HM13;HM13
chr21:46292709-46294744	17	0.0437045	PTTG1IP
chr17:37331425-37331629	9	0.0438006
chr8:142227937-142229160	10	0.0438006	SLC45A4
chr1:2374818-2375814	10	0.0438006
chr17:28088027-28088607	7	0.0438006	SSH2
chr12:69979065-69979724	9	0.0438132	CCT2
chr9:137692944-137693278	6	0.0438166	COL5A1
chr4:186346794-186347571	17	0.0438315	UFSP2;UFSP2
chr7:97736035-97736854	12	0.0441503	LMTK2
chr6:47276455-47277823	12	0.0441956	TNFRSF21
chr13:60970403-60972045	17	0.0441956	TDRD3;TDRD3;TDRD3
chr10:44185039-44186132	10	0.0441956
chr11:117049399-117050234	14	0.0441956	SIDT2
chr7:105172468-105172821	10	0.0441956	RINT1
chr19:58991737-58992134	5	0.0441956	ZNF446
chr1:1271425-1272074	11	0.0441956	DVL1
chr3:118959339-118959934	13	0.0441956	B4GALT4;B4GALT4
chr2:44222741-44223732	12	0.0441956	LRPPRC
chr16:77245944-77247013	11	0.0441956	SYCE1L
chr4:56915270-56915901	10	0.0441956
chr11:102217574-102218247	11	0.0442132	BIRC2
chr5:43066398-43067011	12	0.0442341
chr2:112641337-112641906	12	0.0444379	ANAPC1
chr5:32585603-32586365	13	0.0444379	SUB1
chr10:69609477-69609722	7	0.0444379
chr1:6051595-6052955	21	0.0444379	NPHP4
chr7:2565872-2566114	11	0.0444379	LFNG;LFNG;LFNG;LFNG
chr2:64751141-64752083	12	0.0444379	AFTPH;AFTPH;AFTPH;AFTPH;AFTPH;AFTPH
chr7:148958858-148959891	9	0.0444379	ZNF783
chr4:39046186-39046924	10	0.0444379	KLHL5;KLHL5
chr1:41303355-41304436	10	0.0444379	KCNQ4;KCNQ4
chr17:5019050-5019551	5	0.0444379	ZNF232
chr11:60414666-60414919	4	0.0444379	C11orf64
chr2:10666541-10666765	10	0.0444379
chr19:5567518-5567939	9	0.0444379	PLAC2
chr8:1495105-1495333	7	0.0444379	DLGAP2
chr10:105420685-105421076	8	0.0444379	SH3PXD2A
chr2:242625961-242626720	15	0.0444379	DTYMK;DTYMK;DTYMK
chr5:55007836-55008368	19	0.0444379
chr13:52733378-52733861	17	0.0444379	NEK3;NEK3;NEK3;NEK3
chr6:28104781-28105240	5	0.0444379
chr22:39715473-39715945	25	0.0444379	SNORD43;RPL3;RPL3
chr13:36052553-36053119	15	0.0444379	MIR548F5;NBEA;MAB21L1
chr14:105615342-105615624	3	0.0444379	JAG2;JAG2
chr1:28562510-28562976	10	0.0444379	ATPIF1;ATPIF1;ATPIF1
chr10:575898-576131	16	0.0444379	DIP2C
chr14:67826139-67827526	13	0.0444379	EIF2S1;ATP6V1D
chr10:104677315-104679312	11	0.0444379	CNNM2;CNNM2;CNNM2
chr19:3500416-3500840	10	0.0444379	DOHH;DOHH
chr4:115519422-115520932	15	0.0444379	UGT8;UGT8
chr4:8098825-8099074	8	0.0444379	ABLIM2;ABLIM2;ABLIM2;ABLIM2;ABLIM2;ABLIM2;ABLIM2
chr22:47558272-47558513	6	0.0444379	TBC1D22A
chr16:1979595-1980292	5	0.0444379
chr11:61582573-61584728	29	0.0444379	MIR1908;FADS1
chr10:14920320-14921688	9	0.0444379	SUV39H2
chr5:43556419-43557603	15	0.0444379	PAIP1;PAIP1;PAIP1
chr3:33155227-33156054	16	0.0444379	CRTAP
chr1:205743900-205744668	17	0.0444379
chr5:3606488-3607135	12	0.0444379
chr8:11057684-11058479	10	0.0444379	XKR6
chr6:26240697-26240951	11	0.0444379	HIST1H4F
chr1:91190489-91192804	36	0.0444379
chr2:85554134-85555414	17	0.0444379	TGOLN2
chr16:50875063-50875322	7	0.0444379
chr17:42976710-42977118	11	0.0444379	CCDC103;EFTUD2;EFTUD2;EFTUD2;EFTUD2
chr7:55433147-55434271	15	0.0444379	LANCL2
chr16:84002269-84002860	4	0.0444379	NECAB2
chr19:47731377-47731715	3	0.0444379	BBC3;BBC3;BBC3;BBC3
chr17:73083866-73084495	12	0.0444379	SLC16A5
chr1:36022680-36023834	23	0.0444379	KIAA0319L
chr14:74959680-74960907	19	0.0444379	NPC2;ISCA2
chr19:34286184-34289135	14	0.0446362	KCTD15;KCTD15;KCTD15
chr9:108006467-108007921	6	0.0446362
chr2:10566889-10567148	11	0.0446362	HPCAL1;HPCAL1
chr19:19495952-19497038	11	0.0446362	GATAD2A
chr3:183872925-183873712	9	0.0446362
chr1:36184248-36184774	13	0.0446362	C1orf216
chr15:91423329-91423583	8	0.0446362	FURIN
chr2:201936024-201936376	17	0.0446362	NDUFB3;FAM126B
chr8:22132791-22133357	18	0.0446362	PIWIL2;PIWIL2
chr6:33216103-33217463	64	0.0446362
chr14:65209843-65210089	7	0.0446362	PLEKHG3
chr15:40799292-40799528	5	0.0446362
chr4:144434249-144435343	22	0.0446362	SMARCA5
chr12:62584768-62586268	19	0.0446362	FAM19A2;FAM19A2
chr5:177952110-177952738	8	0.0446362	COL23A1
chr11:118888878-118890115	14	0.0446362	TRAPPC4
chr8:145047293-145052305	28	0.0446362	PARP10
chr8:1430752-1431324	7	0.0446362
chr12:32832130-32832978	13	0.0446362	DNM1L;DNM1L;DNM1L
chr19:1486838-1487346	6	0.0446362	PCSK4
chr16:281088-281316	5	0.0446362
chr11:823556-824878	8	0.0446362	PNPLA2
chr2:201828015-201828514	12	0.0446362	ORC2L
chr3:128444900-128445650	14	0.0446362	RAB7A
chr7:150974116-150974535	11	0.044652
chr2:198363689-198365405	26	0.044652	HSPE1;HSPE1;HSPD1;HSPD1
chr2:227662082-227664912	22	0.044652
chr1:212003431-212004280	16	0.044652	LPGAT1
chr7:70596228-70598382	19	0.044652	WBSCR17
chr17:78965416-78966484	18	0.044652
chr1:40420487-40421366	20	0.044652	MFSD2A;MFSD2A
chr11:118401235-118402069	15	0.044652	TTC36
chr16:87648086-87648688	10	0.044652	JPH3
chr9:470108-470324	5	0.044652
chr15:102192165-102193345	14	0.044652	TM2D3;TM2D3
chr2:3461654-3461863	13	0.044652	TTC15
chr19:36134153-36135781	22	0.044652	ETV2
chr3:111804865-111805570	16	0.044652	C3orf52
chr1:221057463-221057757	10	0.044652	HLX
chr17:35303284-35303572	4	0.0449495
chr1:6452814-6454185	17	0.0451912	ACOT7;ACOT7
chr19:1376554-1377568	5	0.0453249	MUM1;MUM1
chr16:24740666-24741802	14	0.0453249	TNRC6A
chr5:180673068-180673694	16	0.0453249
chr17:7197431-7198417	12	0.0453249	YBX2
chr9:140352818-140354044	6	0.0453249	NELF;NELF;NELF;NELF
chr15:26234597-26234927	8	0.0453249
chr1:45792419-45793301	13	0.0453249	HPDL
chr1:1152522-1153134	6	0.0453249	SDF4;SDF4
chr1:1558587-1559359	7	0.0453249	MIB2;MIB2;MIB2;MIB2;MIB2;MIB2
chr7:27231805-27233097	14	0.0453249
chr6:169331837-169332301	4	0.0453249
chr8:141559164-141559368	14	0.0453249	EIF2C2;EIF2C2
chr4:4387593-4389919	18	0.0453249	D4S234E;D4S234E
chr16:50707291-50708041	8	0.0453249	SNX20;SNX20
chr7:23625611-23626161	5	0.0453249	CLK2P
chr7:75795878-75796446	3	0.0453249
chr12:49420031-49420292	7	0.0453249	MLL2
chr5:178565716-178565918	5	0.0453249	ADAMTS2
chr5:139492723-139492966	9	0.0453249	PURA
chr22:40766459-40767033	14	0.0453249	SGSM3;SGSM3
chr16:2339259-2339552	4	0.0453249	ABCA3
chr17:77983980-77984482	19	0.0453249	TBC1D16
chr20:49411401-49412142	14	0.0453249	BCAS4;BCAS4;BCAS4
chr6:14117616-14118206	7	0.0453249	CD83;CD83
chr8:95653898-95654733	12	0.0453249	ESRP1;ESRP1;ESRP1;ESRP1;ESRP1;ESRP1;ESRP1;ESRP1;ESRP1;ESRP1
chr15:41099243-41099878	15	0.0453249	ZFYVE19;ZFYVE19;DNAJC17
chr7:130353070-130353979	22	0.0453249	TSGA13;COPG2
chr11:92702789-92703434	14	0.0453249	MTNR1B
chr17:79051892-79052534	11	0.0453249	BAIAP2;BAIAP2;BAIAP2;BAIAP2
chr5:140011482-140012739	11	0.0453249	CD14;CD14
chr4:187984505-187984762	6	0.0453249
chr2:176986424-176988291	20	0.0453249	HOXD9
chr9:140437727-140437955	3	0.0453249	PNPLA7;PNPLA7
chr16:740007-740578	12	0.0453249	WDR24
chr19:11285122-11285332	4	0.0453249	KANK2;KANK2
chr10:75541557-75542206	10	0.0453249	CHCHD1
chr2:73114219-73114920	15	0.0453249	SPR
chr18:60193915-60194205	4	0.0453249	ZCCHC2
chr15:66947360-66947574	7	0.0453249
chr3:128368929-128369805	16	0.0453249	RPN1
chr16:34808455-34809874	9	0.0453249
chr1:36549554-36549965	7	0.0453249	TEKT2
chr14:95623080-95624220	14	0.0453249	FLJ45244;DICER1
chr8:10873324-10874174	14	0.0453249	XKR6
chr14:71373964-71375402	13	0.0453249	PCNX
chr12:56511861-56512409	27	0.0453249	RPL41;ZC3H10;RPL41
chr6:28226979-28227483	14	0.0453249	NKAPL
chr15:28351606-28353102	10	0.0453249
chr2:127734403-127734677	6	0.0453249
chr10:134980302-134981059	20	0.0453249	KNDC1
chr6:31856896-31857104	91	0.0453249	EHMT2;EHMT2
chr8:144675988-144676207	7	0.0453249	EEF1D;EEF1D;EEF1D;EEF1D;EEF1D;EEF1D;EEF1D
chr13:41885251-41886196	16	0.0453249	NAA16;NAA16;NAA16;NAA16;NAA16;NAA16
chr11:111169304-111170428	24	0.0453249	C11orf93;C11orf92
chr6:71377385-71378178	16	0.0453249	SMAP1;SMAP1
chr12:108956188-108956759	18	0.0453249	SART3;ISCU;ISCU
chr17:7387280-7388326	13	0.0453249	ZBTB4;POLR2A
chr1:145516038-145516637	15	0.0453249	PEX11B;GNRHR2
chr3:119041382-119042255	8	0.0453249	CDGAP
chr15:93975753-93975979	7	0.0453249
chr14:77843101-77843746	11	0.0453249	C14orf174;TMED8
chr19:50016531-50016851	15	0.0453249	FCGRT;FCGRT
chr1:153963227-153963510	14	0.0453249	RPS27
chr8:124054057-124054733	16	0.0453249	DERL1;DERL1
chr2:70313200-70315490	21	0.0453502	PCBP1
chr4:77723092-77723424	7	0.0454641
chr11:3186131-3186768	38	0.0454641	OSBPL5;OSBPL5;OSBPL5
chr11:66405742-66406691	11	0.0454641	RBM4
chr13:111978588-111979099	15	0.0454641	C13orf16
chr20:4803013-4804146	12	0.0454641	RASSF2
chr6:36953667-36954470	10	0.0454641	MTCH1
chr4:113558032-113558681	18	0.0454641	LARP7;LARP7;LARP7;C4orf21
chr5:506291-506527	7	0.0454641	SLC9A3
chr1:230202494-230204209	17	0.0454641	GALNT2
chr3:193720953-193721291	8	0.0454641
chr15:78730095-78731105	13	0.0454641	IREB2
chr7:128379114-128379697	15	0.04556	CALU;CALU
chr16:2086420-2086892	10	0.04556	SLC9A3R2;SLC9A3R2
chr3:112709666-112710270	15	0.04556	GTPBP8;GTPBP8
chr5:132201901-132202753	20	0.04556	GDF9
chr3:128336406-128337113	11	0.04556
chr4:75023577-75024037	14	0.04556	MTHFD2L
chr2:121492857-121495234	19	0.04556
chr11:66383571-66385047	15	0.04556	RBM14
chr13:31191511-31192189	13	0.04556	USPL1
chr2:62080892-62081363	13	0.04556	FAM161A
chr12:75784799-75785241	12	0.0455619	GLIPR1L2
chr17:37607393-37607718	12	0.0455718	MED1
chr8:30584790-30585651	10	0.0455718	GSR
chr2:198669079-198670154	11	0.045695	PLCL1;PLCL1
chr8:12989380-12989635	11	0.045695	DLC1;DLC1
chr12:26278540-26279707	12	0.045695
chr7:44364432-44365328	16	0.045695	CAMK2B;CAMK2B;CAMK2B;CAMK2B;CAMK2B;CAMK2B;CAMK2B;CAMK2B
chr14:39639364-39639635	12	0.045695	TRAPPC6B;TRAPPC6B;TRAPPC6B;TRAPPC6B
chr12:53693441-53694028	15	0.045695	C12orf10
chr16:4377508-4378162	12	0.045695	GLIS2
chr4:3414681-3415353	23	0.045695	RGS12;RGS12;RGS12
chr14:103593234-103593923	14	0.045695	TNFAIP2
chr4:111119187-111120084	17	0.0457845	ELOVL6;ELOVL6;ELOVL6;ELOVL6
chr19:3204526-3204916	5	0.0460557	NCLN
chr3:47554805-47555404	18	0.0461314	C3orf75
chr5:958785-959172	17	0.0461314
chr12:58129828-58130361	6	0.0461314	AGAP2;AGAP2
chr7:26437727-26438715	11	0.0461314
chr5:138629162-138630308	18	0.0461314	MATR3;MATR3
chr9:35096152-35096673	11	0.0461314	PIGO;PIGO;PIGO
chr4:48832807-48833569	20	0.0461314
chr1:1509482-1510747	12	0.0461314	SSU72
chr15:91475626-91475926	12	0.0461314	UNC45A;HDDC3
chr6:88117707-88118363	10	0.0461314	C6orf165;C6orf165
chr18:19320589-19321939	8	0.0461314	MIB1
chr10:103347679-103348215	14	0.0461314	POLL;RP11-529I10.4
chr1:45205323-45205745	11	0.0461314	KIF2C
chr14:38724254-38725537	13	0.0461314	CLEC14A;CLEC14A
chr1:119682874-119683411	15	0.0461849
chr2:101869023-101869876	9	0.0462167	C2orf29
chr17:7893330-7893702	7	0.0462167
chr14:70655095-70656077	22	0.0462167	SLC8A3;SLC8A3;SLC8A3;SLC8A3
chr1:1691767-1692063	18	0.0462167	NADK
chr2:178077185-178078215	9	0.0462167	HNRNPA3
chr21:47705627-47706428	15	0.0462167	C21orf57;MCM3AP;C21orf57;C21orf57
chr6:167764522-167765124	7	0.0462167
chr17:21116850-21118031	19	0.0462167	TMEM11;TMEM11
chr2:172290364-172291201	14	0.0462167	DCAF17;METTL8;DCAF17;DCAF17
chr19:8372597-8373302	13	0.0462167	NDUFA7
chr12:3599966-3603008	26	0.0462167	PRMT8
chr11:43902254-43902528	13	0.0462167	ALKBH3
chr17:46658948-46660003	21	0.0462167
chr17:46184836-46185174	12	0.0462167	SNX11;SNX11
chr17:80008514-80010567	18	0.0462167
chr14:81421294-81421561	13	0.0462167	TSHR;TSHR;TSHR
chr19:45975848-45976262	9	0.0462167	FOSB;FOSB
chr16:945437-946420	14	0.0462167	LMF1
chr3:158288800-158289271	14	0.0462167	MLF1;MLF1;MLF1
chr4:11429414-11429633	9	0.0462167	HS3ST1
chr2:162164675-162165248	14	0.0462167	PSMD14
chr7:4998405-4998950	10	0.0462167	MMD2;MMD2
chr16:22824616-22826459	17	0.0462167	HS3ST2
chr11:70023057-70023304	7	0.0462167	ANO1;ANO1
chr5:122180963-122181681	15	0.0462167	SNX24
chr2:232063173-232063616	13	0.0462167	ARMC9
chr12:49412299-49412756	8	0.0462167	MLL2;PRKAG1;PRKAG1
chr1:117487249-117487645	7	0.0462167	PTGFRN
chr4:2065542-2066398	9	0.0462167	NAT8L
chr16:29823163-29823906	12	0.0462167	MAZ;MAZ
chr20:39765229-39766832	15	0.0462167	PLCG1;PLCG1
chr12:101801047-101802153	14	0.0462167	ARL1
chr9:80850833-80851434	6	0.0462167	CEP78;CEP78
chr11:62358813-62359674	16	0.0462167	MTA2
chr11:70049099-70049806	18	0.0462167	FADD
chr5:177019064-177019634	10	0.0462167	TMED9
chr3:160282505-160283874	15	0.0462167	KPNA4
chr11:63706029-63706868	13	0.0462167	NAA40
chr10:73610661-73611145	8	0.0462167	PSAP;PSAP;PSAP
chr17:77805866-77809046	13	0.0462167
chr6:105627406-105627830	16	0.0462167	POPDC3
chr3:121553820-121554236	16	0.0462167	IQCB1;IQCB1;EAF2
chr6:37673308-37673774	8	0.0462167
chr10:75012126-75012531	15	0.0462167	MRPS16
chr13:96296143-96297059	14	0.0462167	DZIP1;DZIP1;DZIP1;DZIP1
chr1:67390468-67391109	15	0.0462167	MIER1;WDR78;MIER1;MIER1;MIER1;MIER1;MIER1;WDR78;MIER1;MIER1
chr17:29421595-29422067	17	0.0462167	NF1;NF1;NF1
chr16:30543867-30544332	4	0.0462167	ZNF747
chr17:48917788-48918322	6	0.0462167	WFIKKN2
chr11:10472000-10472857	22	0.0462167	AMPD3;AMPD3;AMPD3
chr13:20806016-20806867	23	0.0462167	GJB6;GJB6;GJB6;GJB6
chr20:2505159-2505979	6	0.0462167
chr19:54605985-54606590	14	0.0462167	NDUFA3
chr14:104000887-104001138	8	0.0462167	TRMT61A
chr17:38020381-38020645	5	0.0462167	IKZF3;IKZF3;IKZF3;IKZF3;IKZF3;IKZF3
chr15:63449418-63449874	18	0.0462167	RPS27L
chr16:949658-949960	9	0.0462167	LMF1
chr4:113066470-113067379	14	0.0462167	C4orf32;C4orf32
chr2:101924364-101925357	10	0.0462167	RNF149
chr1:41826680-41828290	9	0.0462167
chr10:134209367-134211056	14	0.0462669	PWWP2B;PWWP2B
chr7:5160773-5161264	5	0.0462871
chr20:62200652-62200953	4	0.0462871	PRIC285;PRIC285
chr14:50100315-50102009	16	0.0462871	C14orf104;C14orf104;C14orf104;C14orf104
chr9:114287380-114287695	5	0.0462871	ZNF483;ZNF483
chr2:18741356-18741964	13	0.0462871	RDH14
chr4:2470219-2471728	11	0.0462871	RNF4;RNF4
chr11:67797802-67798413	16	0.0464212	NDUFS8
chr2:241758141-241760783	16	0.0464212	KIF1A
chr9:108418403-108418934	9	0.0464703
chr16:70697574-70698363	9	0.0464703	IL34
chr11:33060699-33061846	16	0.0465493	TCP11L1;TCP11L1
chr17:62339803-62340799	17	0.0465493	TEX2
chr1:46088194-46089142	13	0.0465898	CCDC17
chr3:184529812-184530255	16	0.0465898	VPS8;VPS8
chr17:46685244-46685449	20	0.0465989	LOC404266;LOC404266;HOXB6
chr19:3207920-3208157	8	0.0465989	NCLN
chr7:129465404-129466144	9	0.046832
chr9:4679325-4679999	6	0.046832	CDC37L1
chr18:60986621-60988286	34	0.046832	BCL2;BCL2
chr12:57569723-57569941	10	0.046832	LRP1
chr3:128997382-128997600	9	0.0468641	C3orf37;C3orf37
chr5:6755104-6755387	21	0.0468641	POLS
chr17:1944947-1945621	15	0.0468641	DPH1;OVCA2
chr6:149068179-149069775	17	0.0468641	UST
chr14:105486611-105487915	14	0.0470141	CDCA4;CDCA4
chr13:113663201-113663539	13	0.0470141	MCF2L;MCF2L
chr20:10414276-10414993	23	0.0470141	MKKS;MKKS
chr8:110345916-110346904	18	0.0470166	NUDCD1;ENY2
chr20:48531603-48532316	16	0.0470166	SPATA2
chr9:127962543-127963125	7	0.0470166	RABEPK
chr22:50118095-50118822	7	0.0471227
chr16:30593965-30594525	4	0.0471227	ZNF785
chr14:23398410-23398752	12	0.0471227	PRMT5;PRMT5
chr4:152020470-152021110	16	0.0471227	RPS3A
chr11:47573911-47574899	9	0.0471227
chr10:121485063-121485319	11	0.0471227	INPP5F;INPP5F
chr17:80401644-80401858	4	0.0471227	C17orf62;C17orf62;C17orf62
chr1:24828865-24829878	19	0.0471227	RCAN3
chr12:27485683-27486676	9	0.0471227	ARNTL2
chr12:50418935-50419400	12	0.0471575	RACGAP1;RACGAP1;RACGAP1
chr19:2328364-2329089	16	0.0473068	SPPL2B;SPPL2B;LSM7
chr1:24126799-24127549	25	0.0473968	GALE;GALE;GALE;GALE
chr11:8892072-8892794	8	0.0473968	ST5
chr19:9945505-9946389	15	0.0474333	PIN1
chr2:85131950-85132234	9	0.0474333
chr3:47822921-47823194	6	0.0474333	SMARCC1
chr9:127240131-127240456	6	0.0475499	GPR144
chr5:162932454-162932946	21	0.0475822	MAT2B;MAT2B
chr19:19416693-19416945	5	0.0477452	SF4
chr12:861442-863413	13	0.0477682
chr7:99698173-99699646	26	0.0477682	MCM7;AP4M1;MCM7;MCM7
chr4:1231813-1232229	4	0.0478286	CTBP1;CTBP1
chr9:86431954-86433094	2	0.0478286	GKAP1;GKAP1
chr9:71394793-71395492	8	0.0478286	FAM122A;PIP5K1B
chr18:76737005-76741244	20	0.0478286
chr2:242156851-242157835	6	0.0478286	ANO7
chr1:244142851-244143055	5	0.0478286
chr6:41908745-41909711	12	0.0478286	CCND3;CCND3;CCND3;CCND3
chr20:34188719-34190267	7	0.0478286	FER1L4
chr2:37311072-37311893	15	0.0478286	CCDC75;HEATR5B
chr1:204042245-204044510	17	0.0478286	SOX13
chr1:2005179-2005565	31	0.0478286	PRKCZ;PRKCZ
chr7:139477406-139478496	17	0.0478286	HIPK2;HIPK2
chr11:10324353-10324828	6	0.0478286
chr14:76452079-76452542	12	0.0478286	C14orf179;C14orf179
chr19:41837014-41837230	6	0.0478286
chr12:111834869-111835085	7	0.0478286
chr16:28961913-28962791	12	0.0478286	NFATC2IP
chr9:99179479-99181723	10	0.0478286	ZNF367
chr6:136610148-136611285	17	0.0478286	BCLAF1;BCLAF1;BCLAF1
chr7:150676178-150676585	3	0.0478286	KCNH2;KCNH2
chr3:136580875-136581721	12	0.047838	NCK1
chr15:41952535-41953222	11	0.047883	MGA;MGA
chr10:103892659-103893590	18	0.0479752	PPRC1
chr1:43824134-43825059	15	0.0479752	CDC20
chr3:4909962-4910537	7	0.0479752
chr11:119455153-119456102	11	0.0479752
chr13:113729302-113729516	7	0.0479752	MCF2L;MCF2L
chr10:116697893-116698376	13	0.0479752	TRUB1
chr15:75018186-75019336	33	0.0479752	CYP1A1
chr19:2477134-2477377	2	0.0479857	GADD45B
chr20:36156022-36156669	62	0.0479857	BLCAP;BLCAP;BLCAP;BLCAP
chr7:72298512-72298988	5	0.048003	SBDSP;SBDSP;SBDSP;TYW1B;SBDSP;TYW1B
chr10:125804001-125804379	16	0.0480475	CHST15
chr19:15299831-15300167	4	0.0482387	NOTCH3
chr20:62496243-62497196	13	0.0482387	TPD52L2;TPD52L2;TPD52L2;TPD52L2;TPD52L2;TPD52L2
chr1:116184380-116185561	10	0.0483008	VANGL1
chr6:36853590-36853927	10	0.0483431	C6orf89
chr6:30457369-30458175	47	0.0483431	HLA-E
chr17:45400874-45401440	11	0.0483431	C17orf57
chr22:28192793-28198592	26	0.0483431	MN1
chr2:27579296-27580135	7	0.0483431	GTF3C2;GTF3C2
chr6:25279131-25279890	12	0.0483431	LRRC16A
chr15:68126022-68126569	8	0.0483431	LBXCOR1
chr7:195474-195988	10	0.0483431	FAM20C
chr3:22413492-22414365	13	0.0483431
chr19:46214961-46216180	7	0.0484416	FBXO46
chr16:11038164-11038763	12	0.0484416	CLEC16A
chr1:155231812-155232312	16	0.0484416	SCAMP3;SCAMP3
chr5:159200237-159200692	6	0.0484416
chr12:119772353-119772594	9	0.0484416	CCDC60
chr2:114647669-114648312	16	0.0484416	ACTR3
chr12:122906404-122907011	12	0.0484416	CLIP1;CLIP1
chr19:38713166-38713458	6	0.0484416	DPF1;DPF1;DPF1
chr3:18485112-18487056	9	0.0484416
chr14:100704362-100707067	15	0.0484416	YY1;YY1
chr8:49231522-49231810	9	0.0484416
chr15:25958877-25959240	12	0.048532	ATP10A
chr17:48585385-48586167	13	0.048532	MYCBPAP
chr15:42500160-42500561	13	0.048532	VPS39
chr11:64662462-64662880	21	0.0487046	MIR192;MIR194-2
chr16:30991828-30992129	14	0.0487059	SETD1A
chr5:175843118-175843844	11	0.0487059	CLTB;CLTB
chr17:73873528-73874923	16	0.0487059	TRIM47
chr5:10760836-10761925	10	0.0487059	DAP
chr1:8418322-8418857	9	0.0487459	RERE;RERE;RERE
chr17:30845903-30846702	7	0.0487459	MYO1D
chr1:41267919-41268398	8	0.0487459	KCNQ4;KCNQ4
chr22:17652263-17652978	7	0.0488998
chr4:89378223-89378948	11	0.0488998	HERC5
chr19:3801392-3801819	12	0.0488998	MATK;MATK
chr11:118478235-118481896	20	0.0488998	PHLDB1;PHLDB1;PHLDB1
chr15:72476676-72476969	8	0.0490263	GRAMD2
chr11:20385161-20385673	20	0.0490854	HTATIP2;HTATIP2;HTATIP2;HTATIP2;HTATIP2;HTATIP2
chr6:13813943-13814946	11	0.0491989	CCDC90A
chr10:31892189-31892752	10	0.0491998
chr9:37650696-37651409	7	0.0491998	FRMPD1
chr12:130908777-130909191	12	0.0491998	RIMBP2
chr18:71958141-71959770	15	0.0491998	CYB5A;CYB5A
chr1:28199031-28199257	13	0.0492702	C1orf38;C1orf38;C1orf38
chr11:15962882-15963223	7	0.0498416
chr2:27294139-27294915	12	0.0498992	LOC100128731
chr1:3435988-3436250	10	0.0498992	MEGF6
chr12:32552025-32553038	11	0.0498992
chr11:636435-636668	3	0.0498992	DRD4
chr18:74961556-74963822	35	0.0498992	GALR1
chr8:146227946-146228921	23	0.0498992	ZNF252;C8orf77
chr6:33048416-33048814	33	0.0499435	HLA-DPB1
chr12:52545937-52546363	9	0.0499435
