# Supplementary material for: Epigenetic DNA Methylation Signatures Associated With the Severity of Paget’s Disease of Bone
Source: Front Cell Dev Biol. 2022 Jun 13;10:903612. doi: 10.3389/fcell.2022.903612 (PMC9235511; doi:10.3389/fcell.2022.903612)
Supplement: Supplementary file 5 [file Table1.XLSX]

## Sheet: Supplementary Table 1
Supplementary Table1: CpG sites associated with disease severity at FDR<0.05 from site-level analysis
*Genes asociated with bone functions according to GO and IPA are in red-colored text.
CpG ID	Chromosome	Position	Beta	P.Value	FDR	UCSC_RefGene_Name
cg14252008	chr17	57598958	-0.0401021	4.59627e-07	0.0164531	LINC01476
cg13454199	chr7	127914981	0.0277595	1.1646e-06	0.0164531	LEP
cg00040708	chr3	49838627	0.022572	1.30971e-06	0.0164531	CDHR4
cg03694580	chr7	2271722	-0.0351626	1.90858e-06	0.0164531	MAD1L1
cg01872872	chr11	60382923	-0.04653	2.25815e-06	0.0164531	LINC00301
cg19616083	chr15	74908514	-0.0229468	2.2998e-06	0.0164531	CLK3
cg11946072	chr13	47371514	-0.0287252	3.06713e-06	0.018808	ESD
cg01641286	chr2	10483916	-0.0211545	5.33158e-06	0.0253958	HPCAL1
cg09121994	chr1	181205431	-0.0444413	5.3697e-06	0.0253958	LINC01699
cg05080074	chr11	13517684	0.0225687	5.91634e-06	0.0253958	PTH
cg05094429	chr6	167536184	0.024734	6.553e-06	0.0255715	CCR6
cg01132064	chr11	46382562	-0.0246138	8.38928e-06	0.0265344	DGKZ
cg18785140	chr6	32712045	0.0284279	8.63393e-06	0.0265344	HLA-DQA2
cg10712091	chr6	108141883	-0.0265292	8.83876e-06	0.0265344	SCML4
cg22138461	chr2	172291219	-0.0230492	9.3233e-06	0.0265344	DCAF17
cg04355401	chr20	37075704	-0.0217911	9.89053e-06	0.0265344	SNORA39;SNHG11
cg02224845	chr7	143106001	-0.0304995	1.05533e-05	0.0266471	EPHA1
cg18883836	chr1	29240705	-0.0236318	1.19867e-05	0.0270752	EPB41
cg10587940	chr15	85778466	0.0353259	1.35544e-05	0.0270752	---
cg05923072	chr6	74405909	-0.0320489	1.40898e-05	0.0270752	CD109
cg16869008	chr8	145550615	-0.0236126	1.44502e-05	0.0270752	DGAT1
cg14630630	chr7	128003225	-0.040209	1.51159e-05	0.0270752	PRRT4
cg10454857	chr12	132219328	0.0203709	1.5529e-05	0.0270752	SFRS8
cg11753311	chr1	185125656	-0.0278124	1.55336e-05	0.0270752	C1orf25
cg13559478	chr7	148959298	-0.0208501	1.58423e-05	0.0270752	ZNF783
cg19311431	chr2	162091931	0.0337806	1.63997e-05	0.0270752	TANK
cg16904348	chr1	2377415	-0.0377689	1.71798e-05	0.0273126	---
cg03357160	chr6	42531879	-0.0219088	1.85109e-05	0.0277016	UBR2
cg03383661	chr6	42714115	-0.0213594	1.87475e-05	0.0277016	TBCC
cg03014008	chr20	57463767	0.026864	2.00913e-05	0.0277016	GNAS
cg17759093	chr20	23402258	-0.0233	2.04888e-05	0.0277016	NAPB
cg02674324	chr2	70932722	0.0208461	2.10191e-05	0.0277016	ADD2
cg14486632	chr6	145290171	0.0242079	2.3535e-05	0.0277016	---
cg08056850	chr6	30525527	-0.0186568	2.36652e-05	0.0277016	GNL1;PRR3
cg13401071	chr1	49061762	0.0228612	2.40255e-05	0.0277016	AGBL4
cg05219684	chr19	9938335	-0.0231211	2.42668e-05	0.0277016	UBL5
cg23635663	chr22	30639979	0.0403727	2.44356e-05	0.0277016	LIF
cg01281611	chr12	24737405	0.0383751	2.45233e-05	0.0277016	C12orf67
cg00737251	chr2	32234977	-0.026212	2.54969e-05	0.0280628	MEMO1
cg10673833	chr7	45018849	-0.0246171	2.6722e-05	0.0286377	MYO1G
cg08611163	chr1	6266360	-0.0197567	2.78326e-05	0.0286377	RNF207
cg20609803	chr1	161184305	-0.0152032	2.8543e-05	0.0286377	FCER1G
cg02455501	chr19	44079945	-0.0218141	2.86878e-05	0.0286377	XRCC1
cg06320150	chr22	50118247	0.0237141	2.99378e-05	0.028653	---
cg00875541	chr6	31778942	0.0147891	3.08361e-05	0.028653	HSPA1L
cg03349241	chr8	145743334	-0.0229361	3.10857e-05	0.028653	RECQL4;LRRC14
cg09404981	chr2	217904379	0.017715	3.31268e-05	0.028653	---
cg12967319	chr14	101291997	0.0138668	3.38286e-05	0.028653	MEG3
cg03177593	chr3	171890144	-0.0267922	3.40109e-05	0.028653	FNDC3B
cg02734904	chr4	139145210	0.0224133	3.4379e-05	0.028653	SLC7A11
cg25631714	chr4	68566961	-0.0211281	3.45124e-05	0.028653	LOC550112;UBA6
cg09212372	chr5	135188170	0.0321999	3.64508e-05	0.028653	LOC153328
cg07981273	chr13	114881861	0.0273908	3.64914e-05	0.028653	RASA3
cg18362496	chr11	2019930	0.0125849	3.70963e-05	0.028653	H19
cg26709579	chr16	1074308	-0.0305713	3.74454e-05	0.028653	---
cg24335984	chr3	50361554	0.0181122	3.79171e-05	0.028653	HYAL2
cg07582047	chr11	65658459	-0.024615	3.80484e-05	0.028653	CCDC85B
cg18158470	chr15	42496585	-0.0222178	3.8961e-05	0.0288344	VPS39
cg06217803	chr7	128830440	0.0207129	4.2277e-05	0.0301597	SMO
ch.5.1324828F	chr5	70760973	-0.0253614	4.29691e-05	0.0301597	BDP1
cg14820199	chr4	11429415	-0.0436178	4.55216e-05	0.0301597	HS3ST1
cg04784635	chr10	116097581	0.0277433	4.61439e-05	0.0301597	AFAP1L2
cg19294256	chr13	46627018	-0.0211603	4.69121e-05	0.0301597	ZC3H13
cg27350104	chr11	70958638	0.0285885	4.7054e-05	0.0301597	---
cg20031659	chr6	114178324	-0.0168678	4.76943e-05	0.0301597	MARCKS
cg27482856	chr7	99214447	-0.0213275	4.85426e-05	0.0301597	ZNF498
cg07083806	chr2	16083276	-0.0258456	4.9652e-05	0.0301597	MYCN;MYCNOS
cg14910684	chr2	242887053	-0.0273165	5.09184e-05	0.0401597	---
cg19327006	chr6	143084770	0.0173266	5.19888e-05	0.0401597	HIVEP2
cg23174392	chr13	114009751	0.024064	5.32554e-05	0.0401597	GRTP1
cg17359265	chr5	178567126	-0.0175342	5.38896e-05	0.0401597	ADAMTS2
cg07095387	chr17	5390219	-0.0243095	5.42323e-05	0.0401597	MIS12;DERL2
cg05681076	chr5	175066987	-0.0287005	5.43099e-05	0.0401597	---
cg09093388	chr15	65067381	-0.0221754	5.46207e-05	0.0401597	RBPMS2
cg04240491	chr2	30827623	-0.0207006	5.46588e-05	0.0401597	LCLAT1
cg00621125	chr7	26438411	-0.0191669	5.61708e-05	0.0401597	---
cg02103362	chr1	5931895	-0.048825	5.74741e-05	0.0401597	NPHP4
cg16419498	chr10	75012530	-0.0204969	5.78678e-05	0.0401597	MRPS16
cg06861087	chr14	53019167	-0.0217454	5.93765e-05	0.0401597	TXNDC16;GPR137C
cg19120782	chr11	71724432	-0.0196618	6.09901e-05	0.04568	NUMA1
cg09899094	chr7	44122310	-0.0185285	6.12833e-05	0.04568	POLM
cg09481056	chr16	2339260	0.0193463	6.13e-05	0.04568	ABCA3
cg18919106	chr8	132918665	-0.0288696	6.20563e-05	0.04568	EFR3A
cg08452338	chr3	149271990	0.0281923	6.29195e-05	0.04568	WWTR1
cg08601357	chr20	21504446	-0.0298797	6.40455e-05	0.04568	---
cg14462670	chr17	1363732	0.0337447	6.42352e-05	0.04568	---
cg12624894	chr5	132073281	-0.0214937	6.44076e-05	0.04568	KIF3A
cg17510385	chr5	912821	0.0323565	6.44461e-05	0.04568	TRIP13
cg07341934	chr20	57463711	0.02216	6.4991e-05	0.04568	GNAS
cg02904235	chr14	91527369	0.0223278	6.57162e-05	0.04568	RPS6KA5
cg02874226	chr5	180699004	0.0170388	6.60404e-05	0.04568	---
cg09230667	chr1	3436115	-0.0174458	6.6387e-05	0.04568	MEGF6
cg22064195	chr6	30457745	-0.0182387	6.74155e-05	0.04568	HLA-E
cg09594067	chr16	70285806	-0.0196923	6.78089e-05	0.04568	EXOSC6
cg27358811	chr10	98347048	-0.0284008	6.8724e-05	0.049526	TM9SF3
cg15136797	chr2	86851071	-0.0236593	6.89425e-05	0.049526	RNF103
cg16846518	chr3	128062608	0.0243074	6.92026e-05	0.049526	EEFSEC
cg27132050	chr15	45021149	-0.0223106	7.06263e-05	0.049526	---
cg18661550	chr22	29441760	-0.0287923	7.13178e-05	0.049526	ZNRF3
cg17775490	chr20	45179354	-0.0255655	7.17907e-05	0.049526	OCSTAMP
