# Supplementary material for: Epigenetic DNA Methylation Signatures Associated With the Severity of Paget’s Disease of Bone
Source: Front Cell Dev Biol. 2022 Jun 13;10:903612. doi: 10.3389/fcell.2022.903612 (PMC9235511; doi:10.3389/fcell.2022.903612)
Supplement: Supplementary file 6 [file Table5.XLSX]

## Sheet: Supplementary Table 5
Supplementary Table 5: Significant gene body regions associated with PDB severity at FDR<0.05
Red are gene body regions with Bonferroni corrected P-value≤0.05
Gene body	Number of Sites	FDR
CXCR6/FYCO1	17	0.0119405
DENND1A	26	0.0119405
SGK1	25	0.0119405
LOC401093	13	0.0119405
CD82	20	0.0119405
ASNSD1	6	0.0119405
PGM2	6	0.0119405
RAB7A	19	0.0119405
ABTB1	10	0.0119405
ABHD11	8	0.0119405
REPIN1	10	0.0119405
PPP1R15B	10	0.0119405
GCHFR	6	0.0119405
SLC46A3	6	0.0119405
MBNL2	34	0.0121237
OR52D1	1	0.0139282
ZNF540	16	0.0191735
PARP2	3	0.0191735
NDFIP1	10	0.0191735
ACTL7B	6	0.0191735
CLK3	15	0.0191735
EXOSC6	5	0.0191735
LIPT2	4	0.0191735
RYBP	10	0.0191735
C13orf18	9	0.0191735
MLL2	15	0.0191735
THAP4	27	0.0191735
UBE2S	5	0.0191735
NDUFS8	9	0.020637
KCNQ4	32	0.020637
FBXO32	9	0.020637
ARL2BP	4	0.020637
MED28	6	0.020637
NMNAT3	17	0.021028
MRPL33	8	0.0214309
NEDD4	10	0.0217722
TIMM50	7	0.0217722
SHISA4	9	0.0219186
LMOD1	12	0.0224473
TSNAX-DISC1	45	0.0236515
TIMM44	17	0.0237977
LEPRE1	12	0.0237977
MBNL1	29	0.0237977
CLCN1	15	0.0237977
REEP1	12	0.0237977
LRSAM1	6	0.0237977
UNC5A	49	0.0237977
ZFYVE19	11	0.0237977
RPL7L1	1	0.0237977
GEMIN5	6	0.0237977
CCT2	5	0.0237977
SLC44A1	4	0.0237977
ZNF232	14	0.0237977
CCT6A	9	0.0237977
SNX20	14	0.0237977
PYGO2	7	0.0240456
NCRNA00176	5	0.0250355
UFSP1	3	0.0250355
BDP1	6	0.0250355
SIM2	52	0.0250355
BIN2	3	0.0250355
PRIM2	16	0.0250355
CWF19L2	5	0.0250355
KIAA1217	48	0.0250355
UNC50	10	0.0250355
NUDT18	7	0.0250355
ITGA4	13	0.0250355
RIC8B	10	0.0258298
LOC284551	2	0.0258298
ALS2	8	0.0258298
MEMO1	6	0.0258298
GPR153	18	0.0258298
HLCS	21	0.0258298
SOS1	14	0.0258298
HLA-DQB2	40	0.0265469
CRB3	2	0.0265469
HIVEP2	28	0.0265469
HDDC3	6	0.0265469
RAVER1	13	0.0265469
C14orf133	5	0.0265469
KDM6B	40	0.0265469
FKBP1A	5	0.0265469
FLAD1	10	0.0265469
FNDC3B	50	0.0265469
IQGAP1	9	0.0265469
HGSNAT	11	0.0265469
TRANK1	21	0.0267842
FAM134C	14	0.027815
ALOXE3	18	0.027983
EDC3	10	0.027983
IGF1	7	0.027983
SPCS3	7	0.027983
CD58	20	0.027983
PJA2	10	0.0284519
CD14	7	0.0284519
SGMS1	37	0.0284519
ZNF702P	5	0.0284519
PRKDC	23	0.0287155
VPS8	14	0.0287155
POT1	7	0.0287155
TWF2	5	0.0287155
BCAS4	13	0.0288472
SLAMF6	3	0.0289185
ZNF563	4	0.0289185
SNORD116-17	1	0.0289185
SNORD116-19	1	0.0289185
ACAD11	15	0.0289185
GIPR	27	0.0289185
LOC283731	9	0.0289185
PAQR8	13	0.0289185
GPHN	15	0.0289185
ABL2	13	0.0289185
NUDT15	9	0.0290169
CLDN22	2	0.0296299
SNHG11	10	0.0299476
CCDC85B	6	0.0299476
WASH2P	2	0.0299476
FAM53C	13	0.0299476
BHLHE41	11	0.0304788
SLC25A42	12	0.0304788
C10orf82	4	0.0304788
SFRS13B	6	0.0304788
CD320	6	0.0304788
AGTPBP1	5	0.0304788
UGT8	11	0.0304788
PTPN4	14	0.0304788
DDB1	11	0.0304788
CCDC70	3	0.0304788
SCML4	14	0.0304788
SMARCA5	11	0.0304788
PRSS16	11	0.0304788
ADRB2	5	0.0304788
RGS10	19	0.0304788
DPY30	5	0.0304788
UNC45A	24	0.0312919
LENG1	4	0.0312919
BTN2A3	3	0.0312974
NCRNA00202	3	0.0312974
GPR113	18	0.0312974
UBXN11	22	0.0312974
FMN2	39	0.0312974
TAPBP	116	0.0312974
C9orf64	5	0.0312974
BAZ1A	10	0.0312974
SLC11A1	18	0.0312974
GIGYF2	16	0.0312974
MTO1	5	0.0312974
RANBP3	7	0.0312974
COPG2	10	0.0312974
WNT9A	21	0.0312974
C1orf174	17	0.0312974
C6orf147	14	0.0312974
MIR548F5	56	0.0312974
TMX2	6	0.0312974
IMPAD1	8	0.0312974
ASS1	12	0.0312974
MATN4	25	0.0314931
DDX11	1	0.0314931
ZFP64	29	0.0317663
ATP6V1D	8	0.0318582
DEPDC6	11	0.0318582
CGRRF1	5	0.0318582
BDH1	24	0.03205
HSPA9	9	0.03205
RGL1	39	0.0324707
TM6SF1	12	0.0329586
FOXI2	10	0.0329586
NUMA1	40	0.0329586
ATG9A	14	0.0329586
SMU1	7	0.0329586
EFR3A	17	0.0329586
MORC3	5	0.0329586
SAPS3	12	0.0329586
MAPKAPK2	17	0.0329586
ARHGDIA	9	0.0329586
H2AFZ	8	0.0329586
NRGN	12	0.0329586
CKLF	9	0.0329586
CKLF	36	0.0329586
RAB5C	8	0.0329586
C13orf16	20	0.0329586
PTP4A3	26	0.0329586
IRS1	25	0.0329586
PGAP1	5	0.0329586
APH1A	6	0.0329586
METT11D1	10	0.0329586
HNRNPH3	15	0.0329586
SVIP	4	0.0329586
C10orf41	27	0.0329586
TXNDC16	6	0.0329586
PFN2	9	0.0329586
AKAP1	17	0.033216
PINX1	22	0.0335095
PLEKHG4B	39	0.0335095
NECAB3	21	0.0335754
SYNGR1	18	0.0336613
MAPKBP1	13	0.0336613
SLC39A2	1	0.0336613
GTF3C2	6	0.0338385
AADAT	4	0.0338385
HLA-DQA2	21	0.0338385
ZSCAN29	4	0.0338385
KIAA1147	8	0.0338385
PRKAR1A	4	0.0338385
WDR53	7	0.0338385
USP47	15	0.0338385
TM2D3	6	0.0338385
NDUFB8	5	0.0339745
RNF121	9	0.0339745
SPATA2	11	0.0339745
MIR200C	1	0.0340519
PARP10	10	0.0340519
RYR1	57	0.0340519
CDC123	12	0.0340519
RAB22A	7	0.0340969
RNF5P1	16	0.0340969
CACNB1	16	0.034667
DTYMK	20	0.0346951
TMCO3	73	0.0346951
HS6ST1	19	0.0346951
SRD5A3	6	0.0346951
ANKRD33B	36	0.034839
SH3BP2	23	0.034839
RNF5	15	0.034839
TSPAN3	8	0.034839
AFTPH	8	0.034839
TREX1	9	0.034839
PSMC5	8	0.0348782
C1orf157	2	0.0348782
TBC1D9B	18	0.0348782
POLR2A	26	0.0350003
SLC6A3	55	0.0350297
CLEC16A	59	0.0350579
ENPP1	8	0.0350579
CCDC150	7	0.0350579
EPHA7	12	0.0350579
ORMDL2	6	0.0350579
SLC6A18	43	0.0350579
OR52W1	1	0.0350579
SRL	13	0.0350579
LEF1	13	0.0355229
PDZK1	3	0.0355672
TMTC2	16	0.0355958
ADD2	21	0.0358409
MIR548N	82	0.0358409
C17orf89	3	0.0358409
PSMD6	10	0.0358409
GGH	5	0.0358409
SCARNA17	3	0.0361021
ASPSCR1	58	0.0364658
PUS7	12	0.0366218
HPSE2	44	0.0367615
BTG3	8	0.0367682
SPTLC3	3	0.0367996
CLEC17A	1	0.0369039
ICOSLG	6	0.0369389
FAM188B	18	0.0369389
GNAL	46	0.0369506
SQLE	8	0.0372988
DISC1	31	0.0372988
SF3B14	4	0.0372988
PPP1R12B	14	0.0372988
GPR12	9	0.0372988
CLP1	4	0.0373151
SCAMP3	10	0.0373151
FLVCR1	9	0.0373151
CREG1	5	0.0373151
NOG	6	0.0373151
GABARAPL1	10	0.0373151
SLAMF1	5	0.0373151
KCNA2	5	0.0373151
PTER	5	0.0373151
ZNF117	3	0.0373151
GJB6	11	0.0373151
UGT3A1	4	0.0373151
ZNF192	5	0.0373151
PRDM1	15	0.0373151
SNAPIN	5	0.0373406
RTDR1	21	0.0376527
RTL1	32	0.0376527
RAB32	6	0.0381394
PRKACA	4	0.0381394
TRIP13	20	0.0381394
TUBB6	4	0.0381394
HNRNPK	8	0.0381394
AK3L1	12	0.0381394
LOC221710	13	0.0381394
N6AMT1	5	0.0381394
MPHOSPH6	4	0.0381394
ERMAP	17	0.0381394
FAM129A	24	0.0381394
FADS1	21	0.0381394
RAB11FIP5	11	0.0381394
CDK7	4	0.0381394
CAND1	8	0.0381394
C2orf34	23	0.0381394
HIF1A	7	0.0381394
AP2M1	18	0.0381394
HERC5	6	0.0381394
DOCK5	28	0.0381394
COASY	14	0.0381394
C1orf216	8	0.0381394
RBPMS	51	0.0381394
ABHD10	4	0.0381394
SPNS2	19	0.0381394
CHERP	24	0.0381394
MDM1	8	0.0381794
IRF5	4	0.038191
NOXA1	9	0.038191
ENTPD1	8	0.038191
SNORA42	1	0.038191
DHX30	34	0.038191
METTL8	17	0.0383679
TP53RK	9	0.0386315
HAPLN3	17	0.0386947
C17orf80	8	0.0386947
LOC388789	4	0.0386947
SLC26A3	1	0.0386947
PLD4	10	0.0386947
PAIP1	4	0.0386947
SQSTM1	26	0.0386947
TAF4	43	0.0386947
TRAPPC6B	7	0.0386947
C1orf226	6	0.0386947
LOC153328	16	0.0386947
EXOC8	16	0.0386947
CCNT2	6	0.0386947
C1orf66	8	0.0386947
COPZ2	12	0.0386947
FANCD2	5	0.0386947
LFNG	26	0.0386947
CTSD	15	0.0386947
C7orf59	4	0.0386947
FA2H	16	0.0386947
CCDC142	16	0.0386947
ZNF132	2	0.0386947
PRPH	10	0.0386947
NLRP2	8	0.0386947
UBE3C	34	0.0386947
CBFB	8	0.0386947
C6orf106	14	0.0386947
VCL	13	0.0386947
USP21	9	0.0386947
CCDC36	4	0.0386947
IQSEC1	86	0.0386947
TMEM156	5	0.0386947
BCAS3	48	0.0386947
ZNF446	7	0.0386947
RRP15	15	0.0386947
TIGD3	9	0.0386947
WDR37	62	0.0386947
ITGB8	8	0.0386947
LIF	8	0.0386947
ZNRF3	22	0.0386947
SIDT2	11	0.0387076
MAPK9	9	0.038734
PA2G4	9	0.038734
SLC2A1	26	0.038734
PRDM8	34	0.038734
HSPA1L	40	0.0387911
ZNF304	5	0.0387911
STAU2	27	0.0387911
ANKRD44	17	0.0387911
NAF1	8	0.0387911
PRH2	1	0.0387911
CCDC58	2	0.0390441
ZFYVE9	10	0.0390441
GBP3	2	0.0390441
ARFGAP1	19	0.0390441
C1orf25	7	0.0390441
ENC1	7	0.0391094
CEACAM16	12	0.0392829
COL23A1	126	0.0392829
RTP1	6	0.0393249
GGT7	18	0.039365
NIT1	8	0.039365
LRP5	122	0.039365
LSM14A	8	0.039365
CECR2	3	0.039365
CDKL1	5	0.039365
HOMER1	13	0.039505
POPDC3	6	0.039505
C3orf38	7	0.039505
LBXCOR1	24	0.039505
LSM3	9	0.039505
PRMT8	27	0.039505
LOC100129066	13	0.039505
TTL	8	0.039505
FOXP1	116	0.039505
ZDHHC4	6	0.0395478
C1orf122	7	0.0395478
ZFAND2B	4	0.0396447
C3orf71	14	0.039679
DSE	20	0.039679
LANCL2	14	0.039688
DAB2	14	0.039688
PYGM	12	0.039688
CCDC93	12	0.039688
KIAA1199	37	0.0398277
HOXB3	44	0.0398574
RGS7BP	8	0.0399076
ORC2L	9	0.0400047
MRPS11	10	0.0401794
INTS10	7	0.0404284
ZNF396	4	0.0404284
SEPSECS	7	0.0405344
FAM120B	20	0.0405344
EVI5L	23	0.0408241
RCCD1	13	0.0409566
ZCCHC6	3	0.0409566
COPS8	10	0.0410214
ABHD5	9	0.0410214
PALMD	4	0.0410214
GPSM1	27	0.0410214
C1orf128	6	0.0410214
KCNK4	21	0.0410214
SFI1	9	0.0410333
RUSC1	15	0.0410953
PADI4	8	0.0413558
C6orf25	33	0.0413558
ZNF418	5	0.0413558
ZBTB10	10	0.0414563
RCOR1	19	0.0414563
PSMB7	14	0.0414563
DCAF17	9	0.0414563
STMN1	12	0.0414563
SERPINB12	1	0.0416423
TH1L	6	0.0416423
LOC100287227	6	0.0416932
APTX	5	0.0416932
SORBS3	19	0.0416932
ZYG11A	9	0.041738
EEFSEC	44	0.041738
SEC13	6	0.041738
USP46	7	0.041738
PLAC8L1	2	0.041738
FGGY	34	0.041738
IKZF3	6	0.041738
CHCHD1	3	0.0418195
CRAMP1L	51	0.0418195
CHD7	34	0.0418195
PTPN6	11	0.0419322
RBM4	10	0.0421978
NAT10	8	0.0423408
FAM49A	20	0.0423408
RINT1	5	0.0426214
LYRM2	5	0.0426214
TRIM47	15	0.0428224
ACIN1	21	0.0428224
PALLD	63	0.0428224
IL1F10	4	0.0428224
GDF11	5	0.0428224
NCLN	42	0.0429221
SEMA3B	26	0.0433181
RNF135	7	0.0433708
ERI3	35	0.0433708
TRIT1	8	0.0433708
RBM43	6	0.0433708
TRIM31	79	0.0433708
CCDC109A	14	0.0433708
LIN52	6	0.0433708
AUTS2	105	0.0433708
SLC22A13	3	0.0434246
PHLDB3	18	0.0434246
GIT2	15	0.0434246
UBE2I	42	0.0434369
C2orf52	2	0.0434369
P2RX7	9	0.0434369
RECQL5	45	0.0434369
ABCB8	19	0.0434369
PRAM1	14	0.0434369
TUT1	8	0.0436487
PNMA1	9	0.0436487
CCM2	12	0.0436487
PODXL	15	0.0436487
NECAP2	10	0.0436487
RPS19	5	0.0436487
DOCK10	17	0.0436487
BMS1	4	0.0436487
SFT2D1	6	0.0436487
C2orf48	12	0.0436487
SPP1	3	0.0436487
C14orf179	9	0.0436487
MAPK1IP1L	4	0.0436487
TOMM34	6	0.0436487
MCFD2	15	0.0436704
SAR1B	4	0.0436894
MKL1	13	0.0436894
CNGA1	5	0.0436894
CCDC17	10	0.0436894
CCT4	4	0.0436894
BAK1	5	0.0436894
TMCO7	20	0.0436894
CDC25B	7	0.0436894
GKAP1	2	0.0436894
WDR41	6	0.0436894
LOC254559	17	0.0437219
DAAM2	22	0.0437621
LEP	9	0.0437621
PNPLA2	17	0.0438461
FAM118A	9	0.0439157
CSF1	8	0.0439485
IL6R	18	0.0444294
C15orf27	33	0.0444483
PFKL	24	0.0444483
GTF2E1	8	0.0445816
TMEM11	14	0.0446022
UTP6	5	0.0446035
AMBP	3	0.0446035
BCLAF1	7	0.0446035
LOC283856	7	0.0446035
PIP5K1C	62	0.0446035
PTPRM	26	0.0446035
AHSG	8	0.0446035
ACOT13	9	0.0446035
ADSL	7	0.0446035
NHEJ1	12	0.0446035
HSD17B12	12	0.0446035
FANCF	7	0.0446035
SBNO2	69	0.0446035
DDHD2	7	0.0446035
PPP3CC	5	0.0446035
PCDHGB6	124	0.0446035
GRK5	59	0.0446035
SLC35F2	10	0.0446035
STAT5B	10	0.0446035
TBC1D16	125	0.0446035
CHURC1	7	0.0446035
C10orf32	7	0.0446035
HERPUD2	10	0.0446035
SKIV2L2	15	0.0446035
TTC1	8	0.0446035
PLA2G2E	3	0.0446035
CHCHD3	17	0.0446276
HNRNPA3	5	0.0446767
CAMKK1	26	0.0446872
ZBTB34	5	0.0446872
CTSS	4	0.0446872
C10orf91	5	0.0446872
SDCBP2	15	0.0446872
PLEC1	83	0.0449092
SKP2	7	0.0449092
CHRDL2	8	0.0449766
PPA2	7	0.0449892
RBPMS2	17	0.0451742
SYT12	10	0.045177
AOC3	7	0.045177
FER1L4	7	0.045177
NGEF	37	0.045177
MAP2K6	14	0.045177
MIR33B	3	0.045177
C2orf44	5	0.045177
C12orf24	12	0.045177
2020-03-02	8	0.045177
DUSP5	13	0.045177
GTF2I	10	0.045177
MAP2K7	10	0.045177
TK2	13	0.045177
C11orf10	11	0.045177
RDH10	7	0.045177
ZNF33B	3	0.045177
PRKAG1	6	0.045177
PPP3CA	28	0.045177
ZNF384	5	0.045177
TMEM163	16	0.045177
DNAJC14	6	0.045177
YAP1	14	0.045177
POU3F3	6	0.045177
C20orf7	8	0.045177
ANKRD13B	14	0.045177
PHF20	7	0.045177
SGSM3	8	0.045177
AURKAIP1	6	0.045177
PTPRS	83	0.045177
MTHFD2L	6	0.045177
C7orf30	4	0.045177
C10orf55	16	0.045177
EBF3	156	0.045177
GPLD1	8	0.045177
DNAH12	9	0.045177
C2orf90	1	0.045177
CADM1	38	0.045177
C11orf31	4	0.045177
FLJ10357	12	0.045177
MCCC2	5	0.045177
LRGUK	9	0.045177
PUS1	15	0.045177
PDCD1LG2	3	0.045177
ANKS3	25	0.045177
BCL2L14	6	0.045177
C2orf85	12	0.045177
MKKS	6	0.045177
MAVS	6	0.045177
PAK4	15	0.045177
JMJD8	8	0.045177
FAM89A	24	0.045177
MLH1	9	0.045177
AGT	7	0.045177
RERE	98	0.045177
ULK1	33	0.045177
THOC7	7	0.045177
C17orf73	2	0.045177
SH3RF3	75	0.045177
GNAQ	10	0.045177
BCAR1	28	0.045177
INADL	18	0.045177
CKM	4	0.045177
NDUFB3	8	0.045177
INO80C	6	0.045177
ARVCF	26	0.045177
MIR494	1	0.045177
SNORD63	1	0.045177
ACTA1	8	0.045177
CDKN2AIPNL	1	0.045177
MESTIT1	19	0.045177
DLG2	53	0.045177
APBB1IP	13	0.045177
PBX2	22	0.045177
R3HCC1	6	0.045177
LOC728448	5	0.045177
SPATS2L	28	0.045177
SNPH	17	0.045177
NASP	7	0.045177
NFKBIL1	15	0.045177
SERPINB6	18	0.045177
CD248	9	0.045177
ZNF438	14	0.045177
C17orf65	12	0.045177
PARM1	12	0.045177
MICA	35	0.045177
PCDHGA9	129	0.045177
ATF6	18	0.045177
PWP2	5	0.045177
FAM120AOS	14	0.045177
LOC641746	3	0.045177
CRIPAK	6	0.045177
VPS39	8	0.0454617
KIAA1432	4	0.0454671
KIAA2018	9	0.0454671
CALCOCO1	4	0.0454671
EXOSC1	5	0.0454671
CHRNB2	17	0.0454671
KRT7	16	0.0454671
NFKBIB	11	0.0456722
TBC1D17	18	0.0456722
GFM1	15	0.0457633
PLCB3	22	0.0457745
KIF6	21	0.0457745
EPS8L1	13	0.0458326
HS3ST1	19	0.0458326
MGST1	3	0.0458326
EXTL3	23	0.0458326
SNORD104	1	0.0458326
LRPPRC	7	0.0458326
SLC3A2	15	0.0458326
NEK1	9	0.0458326
RPS27L	8	0.0458326
FOSB	13	0.0458326
ZNF747	5	0.0458326
UBA7	4	0.0458985
LY6G5C	16	0.0458985
PLA2G15	7	0.0458985
C19orf66	7	0.0458985
LCOR	13	0.0458985
UBAP2L	9	0.0458985
ZNF75A	6	0.0458985
PCDHGA10	115	0.0458985
PIP4K2C	6	0.0458985
CHMP7	10	0.0458985
C8ORFK29	7	0.0458985
CASC4	6	0.0458985
DZIP1L	9	0.0458985
SPPL3	13	0.0458985
ACOT12	5	0.0459525
HIPK1	17	0.0462361
TBX5	39	0.046265
RPL41	3	0.046265
ALMS1	7	0.0465579
NEK3	6	0.0465579
MYO7B	30	0.0466062
SERPINF2	10	0.0466062
TTC18	7	0.0466062
XRCC6BP1	2	0.0466062
ZFHX3	86	0.0466062
IFFO2	27	0.0466062
CENPC1	3	0.0466062
ALX3	15	0.0466062
PDIA4	9	0.0466062
CKS1B	6	0.0466062
NUDT8	1	0.0466062
PTPRCAP	7	0.0466062
F3	10	0.0466062
DCXR	5	0.0466062
XRCC6	6	0.0466062
RAD9B	6	0.0467386
ZNF14	6	0.0467386
TMEM218	5	0.0470148
SNORA8	1	0.0470148
ARFIP1	8	0.0470148
ACPP	4	0.0470316
C2orf60	11	0.0470316
ESRP1	10	0.0470316
DIRAS3	22	0.0470316
UST	54	0.0470316
KRT72	6	0.0470316
GUF1	4	0.0471371
OR3A1	1	0.0471371
EPB41L3	11	0.0471371
PINK1	11	0.0471371
SLC35E4	5	0.0471371
STAR	4	0.0471564
KIFC3	15	0.0471564
ODZ3	60	0.0472184
C11orf80	19	0.04734
ADCYAP1	16	0.04734
GPR157	8	0.04734
LARP7	10	0.0476403
NRIP3	6	0.0476403
SLC12A8	28	0.0476403
CCL26	3	0.0476403
KRT18	5	0.0476403
NXN	179	0.0476403
LRCH1	31	0.0476403
VPS41	11	0.0476403
HSBP1	7	0.0476403
CATSPER2P1	4	0.0476831
HLA-E	33	0.0476831
C17orf60	3	0.0477158
TRIM55	5	0.0477158
C9orf43	4	0.0477158
RBMS2	8	0.0477158
POP7	9	0.0477158
EIF4E3	15	0.0477158
CYP19A1	13	0.0477158
CCDC55	13	0.0477764
HOXB5	17	0.0478441
TIAM1	24	0.0478441
ATRIP	5	0.0480261
HLA-DOB	21	0.0480261
DNMT3A	56	0.0480685
POU3F1	11	0.0480685
HPN	14	0.0480715
PCDHGB7	103	0.0480927
C12orf10	7	0.0480927
UBE2K	9	0.0482444
NBEA	50	0.0483004
TYW1B	3	0.0483064
COPE	6	0.0484836
VPS35	5	0.0484875
PSMA2	8	0.0484955
TRHR	3	0.0484955
CXXC5	42	0.0484955
PCDHA9	73	0.0486973
PDPR	5	0.0487172
MTMR4	11	0.0488539
RPL5	9	0.0489837
PDE9A	25	0.0490101
EIF4G3	15	0.0495895
ETS2	8	0.0495895
CDX1	10	0.0495895
PECI	7	0.049916
DUSP12	8	0.049916
ALG8	5	0.049916
NFYB	7	0.049916
DPH1	18	0.049916
THEM4	5	0.049916
BIRC3	7	0.049916
HARBI1	9	0.049916
