# Supplementary material for: Epigenetic DNA Methylation Signatures Associated With the Severity of Paget’s Disease of Bone
Source: Front Cell Dev Biol. 2022 Jun 13;10:903612. doi: 10.3389/fcell.2022.903612 (PMC9235511; doi:10.3389/fcell.2022.903612)
Supplement: Supplementary file 7 [file Table7.XLSX]

## Sheet: Supplementary Table 7
Supplementary Table 7: Methylation sites associated with PDB severity and their methylation level is correlated between blood and bone tissue from Ebrahimi et al 28 (R2 > 0.74, FDR < 0.05)
Gene Name	CpG Name	Correlation (R2)	FDR adj.P-value
HPCAL1	cg06621309	0.98959	5.19e-06
HPCAL1	cg17097992	0.794826	0.0262957
HPCAL1	cg05580588	0.811542	0.0209174
FNDC3B	cg17241999	0.898858	0.00412587
FNDC3B	cg26301516	0.80057	0.0243781
ADAMTS2	cg00834922	0.813396	0.0203753
ADAMTS2	cg05656566	0.821609	0.0181156
ADAMTS2	cg21183664	0.761659	0.0396782
ADAMTS2	cg08999896	0.766856	0.0372822
ADAMTS2	cg13398440	0.93799	0.00121142
ADAMTS2	cg00096810	0.840999	0.0133163
ADAMTS2	cg22906486	0.847883	0.0118856
HIVEP2	cg25636439	0.799653	0.024669
HIVEP2	cg04103532	0.809217	0.0216445
HIVEP2	cg26659645	0.844191	0.0126407
MAD1L1	cg11607737	0.793598	0.0267299
MAD1L1	cg10886992	0.827529	0.0165109
MAD1L1	cg16393715	0.907576	0.00331011
MAD1L1	cg00057627	0.850665	0.0113529
MAD1L1	cg19987253	0.779399	0.0321052
MAD1L1	cg10617943	0.901754	0.0038538
MAD1L1	cg13571479	0.774738	0.0340338
MAD1L1	cg17618327	0.802573	0.0236928
MAD1L1	cg00963171	0.801445	0.0240851
MAD1L1	cg06733294	0.807346	0.0222048
MAD1L1	cg23930681	0.77831	0.0325436
MAD1L1	cg21526773	0.827641	0.0164895
MAD1L1	cg10916967	0.757919	0.0414127
SMO	cg26164681	0.766709	0.0373522
RECQL4	cg21092687	0.895929	0.00443659
H19	cg03996735	0.878583	0.00663657
CLK3	cg26223996	0.820915	0.0182947
CLK3	cg14822850	0.771345	0.0353904
GNAS	cg08166863	0.786255	0.0293899
GNAS	cg22860367	0.959634	0.000379957
GNAS	cg04677683	0.948087	0.000738098
GNAS	cg22989942	0.859695	0.00963784
GNAS	cg06324048	0.964431	0.0002732
GNAS	cg24617313	0.988836	6.72e-06
GNAS	cg03908391	0.89043	0.00509234
GNAS	cg22290117	0.928618	0.00177897
GNAS	cg25652859	0.784179	0.0302016
GNAS	cg07105596	0.951988	0.000611231
GNAS	cg27304369	0.936439	0.00129583
GNAS	cg26811638	0.930366	0.00165946
GNAS	cg26534489	0.932971	0.00150208
GNAS	cg08587534	0.968428	0.00019545
GNAS	cg14564778	0.786538	0.0292919
GNAS	cg04257105	0.814753	0.0199804
GNAS	cg20528838	0.771394	0.0353777
GNAS	cg27661264	0.764018	0.0385947
GNAS	cg19589727	0.788533	0.0285237
GNAS	cg10302550	0.780462	0.0316519
GNAS	cg17414107	0.792106	0.0272641
GNAS	cg00943909	0.864646	0.00875531
GNAS	cg19640589	0.87073	0.00777882
GNAS	cg09393900	0.908776	0.00321532
GNAS	cg16737409	0.778177	0.032587
GNAS	cg19116006	0.843075	0.0128631
GNAS	cg21222634	0.785461	0.0297027
GNAS	cg15391834	0.87936	0.00654245
GNAS	cg10003667	0.794197	0.026505
CASZ1	cg09415955	0.757955	0.0414027
CASZ1	cg23670372	0.785882	0.0295319
CASZ1	cg02903756	0.78411	0.0302197
CASZ1	cg14314341	0.851201	0.0112518
ULBP2	cg24740568	0.774	0.0343243
ULBP2	cg18082080	0.787374	0.0289844
TBX5	cg10039965	0.754928	0.042866
TBX5	cg08900101	0.831768	0.0154356
TBX5	cg08184159	0.877245	0.00682493
TBX5	cg15025170	0.940115	0.00109449
TBX5	cg22045225	0.81731	0.0192572
TBX5	cg10281002	0.875927	0.00700035
NUDT15	cg18610890	0.784853	0.0299382
RPL27	cg04069518	0.810561	0.021214
