# Supplementary material for: Epigenetic DNA Methylation Signatures Associated With the Severity of Paget’s Disease of Bone
Source: Front Cell Dev Biol. 2022 Jun 13;10:903612. doi: 10.3389/fcell.2022.903612 (PMC9235511; doi:10.3389/fcell.2022.903612)
Supplement: Supplementary file 8 [file Table8.XLSX]

## Sheet: Supplementary Table 8
Supplementary Table 8: List of Glmnet identified CpG sites based on the discovery set
CpG	UCSC_RefGene_Name
cg16034881	LRRC49;THAP10
cg11913218	CASZ1;CASZ1
cg27471008
cg25848582	HDAC4
cg13420043	ACTL7B
cg27189723	AKR1B1
cg22226568	GCHFR
cg27063327	BCAS3
cg02860281
cg23436746	VWC2
cg01976303	ANKRD11
cg21433085
cg17512742	TIMM50
cg04661834	KCTD5
cg00406010
cg13570904	CHRDL2
cg06510617	ATP2B2
cg15926099	C6orf48
cg02832301	SMOX
cg27180868	TSTD1
cg06972019	ENO1
cg06931446	ARHGEF18
cg02430732	FLJ36777
cg06320150
cg11659475
cg02005758	RAB7A
cg21595092
cg21926094	ZNF232
cg16404040
cg09212372	LOC153328
cg24009067
cg00987136	PSMB7;LOC100129034
cg09226684	KLK10
